## 1 **An Extended Coatomer Binding Motif in the SARS-CoV-2 Spike Protein**

2 Debajit Dey<sup>1,†</sup>, Suruchi Singh<sup>1,†</sup>, Saif Khan<sup>2,‡</sup>, Matthew Martin<sup>1,§</sup>, Nicholas J. Schnicker<sup>2</sup>, Lokesh  
3 Gakhar<sup>2,3,¶</sup>, Brian G. Pierce<sup>4,5</sup>, and S. Saif Hasan<sup>1,6,7,\*</sup>

4  
5 <sup>1</sup>Department of Biochemistry and Molecular Biology, University of Maryland School of Medicine,  
6 108 N. Greene Street, Baltimore, MD 21201

7 <sup>2</sup>Protein and Crystallography Facility, Carver College of Medicine, University of Iowa, 51 Newton  
8 Road, Iowa City, IA 5224

9 <sup>3</sup>Department of Biochemistry, Carver College of Medicine, University of Iowa, 51 Newton Road,  
10 Iowa City IA 52245

11 <sup>4</sup>W.M. Keck Laboratory for Structural Biology, University of Maryland Institute for Bioscience  
12 and Biotechnology Research, 9600 Gudelsky Drive, Rockville, MD 20850

13 <sup>5</sup>Department of Cell Biology and Molecular Genetics, University of Maryland, 4062 Campus  
14 Drive, College Park, MD 20742

15 <sup>6</sup>University of Maryland Marlene and Stewart Greenebaum Cancer Center, University of  
16 Maryland Medical Center, 22. S. Greene Street, Baltimore, MD 21201

17 <sup>7</sup>Center for Biomolecular Therapeutics, University of Maryland School of Medicine, 9600  
18 Gudelsky Drive, Rockville, MD 20850

19  
20 †Shared first authorship

21 ‡Current address: Bridge Institute, USC Michelson Center for Convergent Bioscience, University  
22 of Southern California, 1002 Childs Way, Los Angeles, CA 90089

23 §Current address: University of Pittsburgh Kenneth P. Dietrich School of Arts and Sciences, 139  
24 University PI, Pittsburgh, PA 15260

25 ¶Current address: PAQ Therapeutics, 625 Massachusetts Ave, Cambridge, MA 02139

26 \*Correspondence: Department of Biochemistry and Molecular Biology, University of Maryland  
27 School of Medicine, 108 N. Greene Street, Baltimore, MD 21201; [sshasan@som.umaryland.edu](mailto:sshasan@som.umaryland.edu)

28 **Abstract**

29  $\beta$ -Coronaviruses such as SARS-CoV-2 hijack coatamer protein-I (COPI) for spike protein  
30 retrograde trafficking to the progeny assembly site in endoplasmic reticulum-Golgi intermediate  
31 compartment (ERGIC). However, limited residue-level details are available into how the spike  
32 interacts with COPI. Here we identify a novel extended COPI binding motif in the spike that  
33 encompasses the canonical K-x-H dibasic sequence. This motif demonstrates selectivity for  
34  $\alpha$ COPI subunit. Guided by an *in silico* analysis of dibasic motifs in the human proteome, we  
35 employ mutagenesis and binding assays to show that the spike motif terminal residues are critical  
36 modulators of complex dissociation, which is essential for spike release in ERGIC.  $\alpha$ COPI  
37 residues critical for spike motif binding are elucidated by mutagenesis and crystallography and  
38 found to be conserved in the zoonotic reservoirs, bats, pangolins, camels, and in humans.  
39 Collectively, our investigation on the spike motif identifies key COPI binding determinants with  
40 implications for retrograde trafficking.

## 41 Introduction

42  $\beta$ -Coronaviruses have been responsible for major human respiratory diseases in the last  
43 two decades. In 2002, the severe acute respiratory syndrome coronavirus (SARS-CoV) was  
44 implicated in an epidemic first reported in China before spreading to 27 countries, which resulted  
45 in 774 deaths (Stadler et al., 2003). A decade later, Middle East respiratory syndrome (MERS)  
46 was reported in Saudi Arabia in 2012 with over 30% fatality in patients (Ahmed, 2017; Zaki et al.,  
47 2012). Most recently, the novel SARS-CoV-2 has been implicated in the COVID-19 global  
48 pandemic that has claimed over four million lives. Current efforts to contain the pandemic are  
49 focused primarily on vaccinations using the viral spike protein that is responsible for SARS-CoV-  
50 2 entry into host cells (Polack et al., 2020; USFDA, 2020). Fundamental insights into spike  
51 biogenesis will advance the understanding of how  $\beta$ -coronaviruses exploit host resources during  
52 viral infection and may potentially lead to the development of novel therapeutics.

53 The trimeric  $\beta$ -coronavirus spike is organized into an ectodomain, a transmembrane  
54 domain, and a cytosolic domain (Beniac et al., 2006; Song et al., 2004). In infected cells, the  
55 newly synthesized and post-translationally modified spike is transported from Golgi to the ERGIC  
56 compartment, which is the site of  $\beta$ -coronavirus progeny assembly (Klumperman et al., 1994;  
57 Lontok et al., 2004; McBride et al., 2007). This retrograde trafficking of the spike from Golgi to  
58 ERGIC involves a cytosolic dibasic motif, K-x-H-x-x (Lys-x-His, where x is any amino acid) (Lontok  
59 et al., 2004; McBride et al., 2007). Such C-terminal dibasic motifs and variants such as K-x-K-x-x  
60 and K-K-x-x are widely reported in the cytosolic tail of host membrane proteins that undergo  
61 retrograde trafficking (Cosson and Letourneur, 1994; Gaynor et al., 1994; Jackson et al., 1993;  
62 Townsley and Pelham, 1994). As such, the  $\beta$ -coronavirus spike demonstrates molecular mimicry  
63 of dibasic trafficking motifs (Lontok et al., 2004; McBride et al., 2007). This recycling of spike  
64 protein has been suggested to enhance interactions with the viral membrane (M) protein localized  
65 in ERGIC during progeny assembly and is crucial for spike maturation (Jennings et al., 2021;  
66 Lontok et al., 2004; McBride et al., 2007). These observations establish a key role of the dibasic  
67 motif in SARS-CoV and SARS-CoV-2 infection and propagation cycles. Interestingly, the spike  
68 dibasic motif and adjacent residues are completely conserved in sarbecoviruses, i.e., SARS-CoV  
69 and SARS-CoV-2, although sequence divergence in residues neighboring the dibasic motif is  
70 noted in MERS-CoV (Lontok et al., 2004; McBride et al., 2007).

71 On the host side, retrograde trafficking is mediated by the interactions of dibasic motifs  
72 with the coatomer protein-I (COPI) complex (Cosson and Letourneur, 1994; Letourneur et al.,

73 1994). Seven subunits, namely,  $\alpha$ ,  $\beta$ ,  $\beta'$ ,  $\gamma$ ,  $\delta$ ,  $\epsilon$  and  $\zeta$ , assemble into a COPI complex on retrograde  
74 trafficking vesicles that carry cargo (Dodonova et al., 2015; Duden et al., 1991; Hara-Kuge et al.,  
75 1994; Harrison-Lavoie et al., 1993; Malhotra et al., 1989; Serafini et al., 1991; Stenbeck et al.,  
76 1993; Waters et al., 1991). Prior genetic, biochemical, biophysical, and structural investigations  
77 have shown that the binding site for host cargo dibasic motifs maps to the N-terminal  $\beta$ -propeller  
78 WD40 domains of  $\alpha$  and  $\beta'$ COPI subunits, which are structural homologs (Cosson and Letourneur,  
79 1994; Eugster et al., 2004; Fiedler et al., 1996; Jackson et al., 2012; Ma and Goldberg, 2013;  
80 Schroder-Kohne et al., 1998). Mutagenesis analyses of  $\alpha$  and  $\beta'$  subunit N-terminal WD40  
81 domains have identified residues critical for binding of host protein dibasic motifs (Jackson et al.,  
82 2012). This and another study (Ma and Goldberg, 2013) provided important structural details of  
83 how dibasic host and viral peptides bind to  $\alpha$ COPI-WD40 and  $\beta'$ COPI-WD40 domains.

84 Cellular and biochemical investigations in recent years and during the ongoing COVID-19  
85 pandemic have suggested a role of COPI interactions in sarbecovirus spike trafficking,  
86 maturation, glycan processing, and syncytia formation during infection (Cattin-Ortolá et al., 2021;  
87 Jennings et al., 2021; McBride et al., 2007). These studies have established a platform to  
88 investigate the underlying chemistry of spike-COPI interaction. For instance, it is not known  
89 whether the K-x-H motif is sufficient to determine the strength of this interaction, whether adjacent  
90 residues in the spike cytosolic tail play a role in this binding, and what are the sequence  
91 determinants of spike-COPI disassembly crucial for spike release in ERGIC. On the host side, it  
92 is presently not known which COPI residues are critical for spike interactions. As such, key facets  
93 of this initial binding event in spike trafficking remain largely unknown for SARS-CoV-2 as well as  
94 SARS-CoV. In the present investigation, we address these questions using a combination of bio-  
95 layer interferometry (BLI), molecular modeling, mutagenesis, X-ray crystallography, and an *in*  
96 *silico* analysis of the human membrane proteome. Employing a sarbecovirus spike hepta-peptide  
97 corresponding to the K-x-H-x-x motif, we identify critical residues in  $\alpha$ COPI-WD40 for hepta-  
98 peptide binding and demonstrate structural alterations in an  $\alpha$ COPI-WD40 mutant. Amino acid  
99 propensity is described in human dibasic motifs and adjacent downstream residues, and  
100 mutagenesis experiments driven by this analysis provide insights into how sarbecovirus spike  
101 modulates strength of binding to COPI. Collectively, our study advances the structural and  
102 biophysical understanding of how the dibasic motif hijacks COPI for spike retention in endo-  
103 membranes and trafficking to the plasma membrane during sarbecovirus infections.

## 104 Results

### 105 pH Modulated direct binding of sarbecovirus spike hepta-peptide to $\alpha$ COPI-WD40 domain

106 In this investigation, we heterologously expressed and purified the N-terminal WD-40  
107 domain of  $\alpha$ COPI-WD40 (residues 1-327) from *Schizosaccharomyces pombe* (**SI Figure S1**).  
108 Although SARS-CoV-2 infects mammals, we chose this *S. pombe* construct for two reasons. First,  
109 the putative interaction interface for dibasic peptides is conserved between this construct and the  
110 human  $\alpha$ COPI-WD40 homologue, COPA (Jackson et al., 2012; Ma and Goldberg, 2013). Second,  
111 this construct has been previously crystallized and structurally characterized (Ma and Goldberg,  
112 2013). This is consistent with our aim of understanding the structural basis of spike-COPI  
113 interactions. A crystal structure of the purified  $\alpha$ COPI-WD40 domain was determined to 1.75Å  
114 resolution (**Figure 1a, Table 1**). The  $\alpha$ COPI-WD40 domain is organized into a  $\beta$ -propeller and is  
115 consistent with previously described structures of  $\alpha$ COPI-WD40 (C $\alpha$  root-mean-square-deviation  
116 is <0.5Å) (Ma and Goldberg, 2013). However, a peripheral loop and a short  $\alpha$ -helix (Gly<sup>168</sup>-Ala<sup>188</sup>,  
117 shown with an arrow in **Figure 1a**) demonstrate substantial differences from previously described  
118  $\alpha$ COPI-WD40 structures likely due to altered crystal packing. An N-terminal acetylation of the  
119  $\alpha$ COPI-WD40 polypeptide was identified in the structure. Importantly, the  $\alpha$ COPI-WD40 domain  
120 interface for putative interactions with dibasic motifs is similar between the structure determined  
121 here and previously published structures (Ma and Goldberg, 2013).

122 Recent investigations of SARS-CoV-2 spike and previously of SARS-CoV spike with COPI  
123 have employed cellular lysates (Cattin-Ortolá et al., 2021; Jennings et al., 2021; McBride et al.,  
124 2007). Hence, we asked if there is direct interaction between the purified components. To address  
125 this question, we first established a BLI assay to test this interaction. A hepta-peptide of the  
126 sarbecovirus spike (<sup>1267</sup>Gly-Val-Lys-Leu-His-Tyr-Thr<sup>1273</sup>, **Figure 1b**) was synthesized with an N-  
127 terminal biotin tag attached via a linker. The hepta-peptide C-terminus has a free carboxylate to  
128 mimic the C-terminus of a polypeptide. This hepta-peptide (or its sequence variants) was  
129 immobilized on a streptavidin biosensor for BLI analysis. The purified  $\alpha$ COPI-WD40 domain was  
130 provided as the analyte in the BLI assay (**Figure 1c-i**). It was observed that the spike hepta-  
131 peptide binds directly to the purified  $\alpha$ COPI-WD40 domain with an equilibrium dissociation  
132 constant ( $K_D$ )=4.17±0.04  $\mu$ M and a kinetic  $K_D$ =2.75±0.09  $\mu$ M at pH 7.5 (**Figure 1c-e**). A scrambled  
133 sequence of this hepta-peptide showed no detectable interaction with  $\alpha$ COPI-WD40 (**Figure 1f**),  
134 suggesting that the binding of the wild-type hepta-peptide was sequence specific. This binding  
135 analysis demonstrates that the C-terminal peptide of the sarbecovirus spike contains sufficient  
136 sequence and structural information to interact directly with  $\alpha$ COPI-WD40. This is consistent with  
137 prior COPI binding analyses with peptides corresponding to host dibasic motifs (Jackson et al.,

138 2012; Ma and Goldberg, 2013). In contrast, this sarbecovirus hepta-peptide demonstrates  
139 extremely weak binding to  $\beta'$ COPI-WD40 (**SI Figure S2a-d**). This selectivity for  $\alpha$ COPI-WD40 is  
140 consistent with that reported for a similar spike hepta-peptide ( $^{1377}\text{Phe-Glu-Lys-Val-His-Val-}$   
141  $\text{Gln}^{1383}$ ) from porcine epidemic diarrhea virus (PEDV), an  $\alpha$ -coronavirus (Ma and Goldberg, 2013).

142 One of the first analyses of COPI involvement in SARS-CoV spike trafficking employed  
143 cellular lysate pull-downs to show enhanced spike-COPI interactions under acidification to pH 6.5  
144 (McBride et al., 2007). As the sarbecovirus hepta-peptide contains His<sup>1271</sup> in the K-x-H motif, we  
145 asked if this acidification would affect hepta-peptide interaction with  $\alpha$ COPI-WD40. A nearly 3-  
146 fold enhancement in binding between the wild-type hepta-peptide and  $\alpha$ COPI-WD40 (equilibrium  
147  $K_D=1.40\pm 0.15 \mu\text{M}$ ) was observed upon acidification to pH 6.5, likely due to partial protonation of  
148 the His residue in the hepta-peptide K-x-H motif (**Figure 1d, g**). Relative to pH 7.5, this lower pH  
149 accelerated the association rate of the hepta-peptide with  $\alpha$ COPI-WD40 by a factor of 1.7 while  
150 concomitantly suppressing complex dissociation by another 1.7-fold (**Figure 1h, i**). As such,  
151 acidification was inferred to be a key factor in stabilizing the hepta-peptide complex with  $\alpha$ COPI-  
152 WD40. All subsequent BLI assays were performed at pH 6.5 The biochemical basis of cytosolic  
153 acidification in sarbecovirus infections is discussed below.

154

### 155 **The terminal residues in the spike hepta-peptide are key modulators of $\alpha$ COPI-WD40** 156 **binding and dissociation**

157 Co-crystallization was attempted to map the interaction interface between the spike hepta-  
158 peptide and the purified  $\alpha$ COPI-WD40 domain. Although crystals were obtained in several  
159 conditions, no density for the hepta-peptide was observed as the putative binding site on  $\alpha$ COPI-  
160 WD40 was blocked by symmetry related molecules in the crystal lattice (data not shown). This  
161 tendency of self-association between WD40  $\beta$ -propeller domains in a crystal lattice has been  
162 previously described (Jackson et al., 2012; Ma and Goldberg, 2013). Hence, homology modeling  
163 was employed to analyze the structural basis of interaction between SARS-CoV-2 spike hepta-  
164 peptide and  $\alpha$ COPI-WD40 domain. This modeling was based on a prior co-crystal structure of  
165  $\alpha$ COPI-WD40 domain with a dibasic peptide (Ma and Goldberg, 2013). Apart from the Lys<sup>1269</sup> and  
166 His<sup>1271</sup> residues in the K-x-H motif, the terminal Tyr<sup>1272</sup>-Thr<sup>1273</sup> residues in the hepta-peptide are  
167 within interaction distance of  $\alpha$ COPI-WD40 surface residues (**Figure 2a**). This is intriguingly  
168 suggestive of a role of these two spike residues in binding  $\alpha$ COPI. Interestingly, the two N-terminal  
169 residues in the hepta-peptide, i.e., Gly<sup>1267</sup>-Val<sup>1268</sup>, make no contact with the  $\alpha$ COPI-WD40 surface.  
170 To evaluate the role of the spike residues in binding  $\alpha$ COPI-WD40, *in silico* alanine scanning  
171 mutagenesis of the modeled spike hepta-peptide was performed (**Table 2**). The spike Lys<sup>1269</sup> and

172 His<sup>1271</sup> residues that constitute the K-x-H dibasic motif are predicted to be most crucial for binding  
173  $\alpha$ COPI-WD40 domain. The *in silico* mutations of these residues to Ala yield highly unfavorable  
174 free energy changes suggestive of substantially weakened binding to  $\alpha$ COPI-WD40 (**Table 2**).  
175 The Ala mutation of Tyr<sup>1272</sup> in the spike peptide implies a significant role of this residue in  
176 stabilization of the spike- $\alpha$ COPI-WD40 complex. This is likely due to the side chain interaction  
177 between the oxygen atom in Tyr<sup>1272</sup> side-chain hydroxyl group with the  $\alpha$ COPI-WD40 His<sup>31</sup> side-  
178 chain NE2 atom, along with main chain interactions of Tyr<sup>1272</sup>. The terminal residue in the spike,  
179 i.e., Thr<sup>1273</sup>, is predicted to contribute modestly to the stabilization of the complex with  $\alpha$ COPI-  
180 WD40 (**Table 2**).

181 Next, we tested this *in silico* model of interactions between the spike hepta-peptide and  
182  $\alpha$ COPI-WD40 using BLI assays (**Figure 2b-k**). The mutagenesis of Lys<sup>1269</sup> or His<sup>1271</sup> in the spike  
183 K-x-H motif to Ala residues abolished binding to  $\alpha$ COPI-WD40 (**Figure 2b, c**). As expected, the  
184 dual Ala mutation of the K-x-H motif does not demonstrate any substantial binding to  $\alpha$ COPI-  
185 WD40 (**Figure 2d**). As such, both basic residues in SARS-CoV-2 spike K-x-H motif are individually  
186 and concomitantly required for  $\alpha$ COPI-WD40 binding. Replacement of either residue is sufficient  
187 to disrupt  $\alpha$ COPI-WD40 binding to the spike hepta-peptide. These data are consistent with the *in*  
188 *silico* predictions described above as well as with cellular assays on SARS-CoV and SARS-CoV-  
189 2 spike trafficking (Cattin-Ortolá et al., 2021; Jennings et al., 2021; McBride et al., 2007). We next  
190 tested the contribution of spike hepta-peptide Tyr<sup>1272</sup> residue to  $\alpha$ COPI-WD40 binding. A BLI  
191 assay of a mutant Tyr<sup>1272</sup>→Ala spike hepta-peptide (<sup>1267</sup>Gly-Val-Lys-Leu-His-Ala-Thr<sup>1273</sup>) yielded  
192 an equilibrium  $K_D=3.77\pm 0.34$   $\mu$ M, which is 2.7-fold weaker than the wild-type spike peptide  
193 (**Figure 2e, f**). Although this mutation only reduced the rate of complex formation by 1.3-fold  
194 relative to the wild-type hepta-peptide (**Figure 2h**), it accelerated complex dissociation by 1.9-fold  
195 (**Figure 2i**). This suggests weakened interactions of the spike hepta-peptide with  $\alpha$ COPI-WD40  
196 when the aromatic side chain interactions of Tyr<sup>1272</sup> are abrogated. Collectively, this BLI analysis  
197 indicates that Tyr<sup>1272</sup> is important for complex stability. These experimental results are consistent  
198 with the above described *in silico* model (**Table 2**). Next, we evaluated the C-terminal position  
199 Thr<sup>1273</sup> in the spike. A BLI assay of a mutant Thr<sup>1273</sup>→Ala hepta-peptide (<sup>1267</sup>Gly-Val-Lys-Leu-His-  
200 Tyr-Ala<sup>1273</sup>) yielded an equilibrium  $K_D=1.13\pm 0.05$   $\mu$ M, which is similar to the wild type hepta-  
201 peptide ( $K_D=1.40\pm 0.15$   $\mu$ M) (**Figure 2f, j**). This Thr<sup>1273</sup>→Ala mutation caused a slowing down of  
202  $\alpha$ COPI-WD40 association-dissociation kinetics by 2.3 and 1.9-fold respectively (**Figure 2h, i**).  
203 This suggested that a  $\beta$ -branched residue at the C-terminus may be an important determinant in  
204 complex formation kinetics. To probe further, we generated a Thr<sup>1273</sup>→Val mutant hepta-peptide,  
205 which maintains a  $\beta$ -branched residue at the C-terminus. Val has methyl groups at the two side

206 chain  $\gamma$  positions, which replace a methyl and a hydroxyl group at equivalent  $\gamma$  positions in Thr. A  
207 BLI assay of this mutant hepta-peptide showed a 2.3-fold weakened interaction with  $\alpha$ COPI-  
208 WD40 relative to the wild type, with an equilibrium  $K_D=3.20\pm 0.04$   $\mu$ M (**Figure 2f, k**). Interestingly,  
209 this mutant demonstrated 1.5-fold slower association kinetics and 1.5-fold more rapid dissociation  
210 than for the wild type hepta-peptide (**Figure 2h, i**). Compared to the Thr<sup>1273</sup>→Ala hepta-peptide,  
211 this Thr<sup>1273</sup>→Val mutant weakened binding by 2.8-fold while accelerating  $\alpha$ COPI-WD40 complex  
212 association and dissociation kinetics by 1.5 and 2.8-fold respectively (**Figure 2f, h, and i**). These  
213 data suggest that a  $\beta$ -branched residue at the spike C-terminus is involved in dissociation of the  
214 complex with  $\alpha$ COPI-WD40. Interestingly, a prior analysis implicated  $\beta$ -branched residues at the  
215 penultimate position in the PEDV spike sequence in modulating interactions with COPI-WD40  
216 domains (Ma and Goldberg, 2013).

217

### 218 **Electrostatics of spike hepta-peptide C-terminus drive dissociation from $\alpha$ COPI-WD40**

219 We performed an *in silico* analysis of the human proteome to gain insights into whether  
220 the spike extended dibasic motif demonstrates consistency with host dibasic motifs and their  
221 environment. We identified 119 sequences predicted to be membrane proteins that terminate with  
222 K-x-H-x-x and K-x-K-x-x dibasic motifs (**SI Table T1**). These sequences were aligned and  
223 analyzed for the frequency of 20 amino acids at each of the positions in the dibasic motif and the  
224 two terminal residues following the motif (**Figure 3a, SI Table T2**). This analysis revealed novel  
225 details about the dibasic motif. First, it was inferred that the predominant dibasic motif is K-x-K-x-  
226 x rather than K-x-H-x-x by nearly an order of magnitude. Second, only a low frequency (0.07) of  
227 the sequences have an aromatic residue at the penultimate position, which corresponds to Tyr<sup>1272</sup>  
228 in the SARS-CoV-2 spike.  $\beta$ -Branched residues Leu, Ile, Val, Ser, and Thr are found at a high  
229 frequency of 0.38 at this penultimate position. Third, acidic residues at the C-terminus are  
230 observed in nearly a quarter (frequency=0.24) of the sequences. Overall, with a frequency of 0.42,  
231 the C-terminal position has a strong tendency to be occupied by charged residues such as Arg,  
232 Asp, Glu, His, and Lys. Hydroxyl side chain containing Thr, which corresponds to Thr<sup>1273</sup> in SARS-  
233 CoV-2 spike, is a low frequency residue (0.05). In our *in silico* model of the hepta-peptide  
234 complexed with  $\alpha$ COPI-WD40, the side chain of this Thr<sup>1273</sup> residue is within interaction distance  
235 of a cluster of basic residues in  $\alpha$ COPI-WD40 (Arg<sup>13</sup>, Lys<sup>15</sup>, and Arg<sup>300</sup>, **Figure 3b**). Hence, we  
236 hypothesized that the presence of a charged residue at this spike position would modulate  
237 interactions with  $\alpha$ COPI-WD40. This was supported by our *in silico* analysis, which predicted  
238 stabilization of the complex when an acidic Glu residue replaced Thr<sup>1273</sup> in the spike hepta-peptide  
239 (**Table 2**).



240 We next tested the role of this spike C-terminal residue in modulating  $\alpha$ COPI-WD40  
241 binding using a BLI assay (**Figure 3c-i**). We employed three distinct mutations of the spike hepta-  
242 peptide at this position, i.e., acidic (Glu), basic (Arg), and neutral (Gln) (**Figure 3c-e**). The  
243 presence of an acidic Glu residue at the C-terminus was found to substantially strengthen binding  
244 of the hepta-peptide to  $\alpha$ COPI-WD40 with an equilibrium  $K_D=0.31\pm 0.01$   $\mu$ M, which is 4.5-fold  
245 tighter than the binding of the wild type hepta-peptide sequence (**Figure 3f**). This is consistent  
246 with our *in silico* model and is strongly suggestive of an electrostatic interaction between the  
247 Glu<sup>1273</sup> side chain and  $\alpha$ COPI Arg<sup>13</sup>, Lys<sup>15</sup>, and Arg<sup>299</sup> side chains to stabilize the complex.  
248 Furthermore, the rate of dissociation of  $\alpha$ COPI-WD40 domain from the Glu<sup>1273</sup> hepta-peptide is 6-  
249 fold slower than that of the wild-type spike hepta-peptide (**Figure 3h**). In fact, during the time  
250 course of our experiment, we did not observe complete dissociation of this complex with the  
251 Glu<sup>1273</sup> containing hepta-peptide. To eliminate the possibility of non-specific interactions, we  
252 employed a hepta-peptide with a scrambled sequence (**SI Figure S3**). Next, we tested whether  
253 modifying side-chain charge at the C-terminal position of the spike hepta-peptide affects complex  
254 formation with  $\alpha$ COPI-WD40. Relative to Glu<sup>1273</sup>, the binding between  $\alpha$ COPI-WD40 domain was  
255 weakened when neutral Gln<sup>1273</sup> was substituted into the hepta-peptide (equilibrium  $K_D=0.78\pm 0.04$   
256  $\mu$ M, **Figure 3d, f**). However, the binding of the hepta-peptide with Gln<sup>1273</sup> was still 1.8-fold tighter  
257 than that of the wild-type hepta-peptide (**Figure 3f**). In contrast, basic Arg<sup>1273</sup> in the spike hepta-  
258 peptide (equilibrium  $K_D=1.73\pm 0.24$   $\mu$ M) yielded an interaction strength similar to the wild type  
259 sequence (equilibrium  $K_D=1.40\pm 0.15$   $\mu$ M, **Figure 3e, f**). The amide carbonyl group in the Gln<sup>1273</sup>  
260 side-chain likely interacts with the basic residue cluster on  $\alpha$ COPI-WD40 through hydrogen  
261 bonding. This stabilizing interaction is disrupted when Gln is replaced by Arg<sup>1273</sup> in the spike  
262 hepta-peptide. Intriguingly, the rate of association with  $\alpha$ COPI-WD40 was slowed down relative  
263 to the wild type hepta-peptide by a factor of 2.6 for Glu<sup>1273</sup> and Gln<sup>1273</sup>, whereas it was similar to  
264 that of Arg<sup>1273</sup> containing hepta-peptide (**Figure 3i**). Overall, these data establish a critical role of  
265 the C-terminal position in the SARS-CoV-2 spike in modulating binding to  $\alpha$ COPI-WD40.

266

### 267 **A polar $\alpha$ COPI-WD40 interface for spike hepta-peptide binding**

268 We subsequently focused our attention on the spike binding residues in  $\alpha$ COPI-WD40.  
269 The *in silico* modeling of SARS-CoV-2 spike hepta-peptide shows that interaction with  $\alpha$ COPI-  
270 WD40 domain involves predominantly polar residues (**Table 3**). Amongst these residues, Arg<sup>57</sup>,  
271 Asp<sup>115</sup>, and Tyr<sup>139</sup> provide the highest level of stabilization to spike hepta-peptide binding. The  
272 Arg<sup>57</sup> side-chain interacts with the main chain carbonyl of spike His<sup>1271</sup>, Tyr<sup>1272</sup>, and Thr<sup>1273</sup> (**Figure**  
273 **4a**). The Asp<sup>115</sup> side-chain forms a bond with the terminal NZ atom in the spike Lys<sup>1269</sup> side-chain

274 **(Figure 4b)**. This side-chain of spike Lys<sup>1269</sup> is further stabilized by an interaction with the hydroxyl  
275 oxygen in Tyr<sup>139</sup> side-chain **(Figure 4c)**. Hence, the side chains of  $\alpha$ COPI-WD40 Arg<sup>57</sup>, Asp<sup>115</sup>,  
276 and Tyr<sup>139</sup> residues provide an extensive and polar interaction network for binding of the spike  
277 hepta-peptide. Therefore, mutagenesis of these three  $\alpha$ COPI-WD40 residues to Ala is predicted  
278 to disrupt interactions with the spike hepta-peptide as suggested by our *in silico* analysis **(Table**  
279 **4)**.

280 Next, the role of  $\alpha$ COPI-WD40 Arg<sup>57</sup>, Asp<sup>115</sup>, and Tyr<sup>139</sup> residues in binding the spike  
281 hepta-peptide was tested. We generated three single-site mutants of  $\alpha$ COPI-WD40 wherein Arg<sup>57</sup>,  
282 Asp<sup>115</sup>, and Tyr<sup>139</sup> residues were individually mutated to Ala. These mutants were expressed  
283 heterologously and purified from Expi293 cells. Analysis by SEC suggested an overall similarity  
284 in hydrodynamic radius with the wild-type  $\alpha$ COPI-WD40 domain **(SI Figure S1)**. These three  
285 mutants were analyzed for binding to the wild-type spike hepta-peptide by BLI assays. All three  
286 mutants demonstrated extremely weak binding to the wild type sequence of the spike hepta-  
287 peptide **(Figure 4d-f)**. This demonstrated that  $\alpha$ COPI-WD40 residues Arg<sup>57</sup>, Asp<sup>115</sup>, and Tyr<sup>139</sup>  
288 are individually critical for binding the spike hepta-peptide. Disruption of even one of these  
289 interactions is likely sufficient to destabilize the spike-COPI complex.

290

### 291 **Structural basis of conformational changes in an $\alpha$ COPI-WD40 mutant**

292 The results of  $\alpha$ COPI-WD40 Arg<sup>57</sup>, Asp<sup>115</sup>, and Tyr<sup>139</sup> mutagenesis led us to ask if the loss  
293 of binding to the spike hepta-peptide was due to disruption of a single critical interaction or due to  
294 larger alterations in the protein structure. To address this question, we crystallized  $\alpha$ COPI-WD40  
295 Arg<sup>57</sup>→Ala and Tyr<sup>139</sup>→Ala mutants. The  $\alpha$ COPI-WD40 Asp<sup>115</sup>→Ala mutant did not yield crystals  
296 in the conditions we tested. The crystal structures of  $\alpha$ COPI-WD40 Arg<sup>57</sup>→Ala and Tyr<sup>139</sup>→Ala  
297 mutants were determined by X-ray diffraction to a resolution of 1.24Å and 1.49Å, respectively  
298 **(Table 1)**.

299 The  $\alpha$ COPI-WD40 Arg<sup>57</sup>→Ala mutant structure demonstrated novel structural alterations  
300 that had previously not been reported in the crystal structures of wild-type  $\alpha$ COPI-WD40 or the  
301 related  $\beta$ 'COPI-WD40 **(Figure 5a)**. The mutation of Arg<sup>57</sup> to an Ala residue generated a cavity in  
302 the spike hepta-peptide binding site. This change led to a 62° rotation of a nearby Tyr<sup>97</sup> residue  
303 side chain into the newly generated cavity in  $\alpha$ COPI-WD40 **(Figure 5b)**. In parallel, the residue  
304 Asp<sup>73</sup> underwent a substantial conformational change. This residue interacts with the side chain  
305 of Arg<sup>57</sup> in the wild-type  $\alpha$ COPI-WD40 structure. However, the loss of stabilizing interactions from  
306 the Arg<sup>57</sup> side chain and the reorientation of Tyr<sup>97</sup> caused the Asp<sup>73</sup> side chain to rotate away by  
307 73° from its initial position **(Figure 5b)**. These conformational changes are accompanied by a

308 1.1Å and 0.8Å movement of Tyr<sup>139</sup> and His<sup>31</sup> side chains respectively closer towards the spike  
309 hepta-peptide as inferred from our *in silico* model. In contrast, the side chain of Lys<sup>15</sup> moves 1.7Å  
310 away from the inferred hepta-peptide position. As such, the binding site and its vicinity  
311 demonstrate a substantially modified interaction network in Arg<sup>57</sup>→Ala mutant.

312 Next, we asked if Arg<sup>57</sup>→Ala mutation and the associated rotameric changes caused any  
313 main chain reorganization in αCOPI-WD40. To obtain a global overview of changes in the main  
314 chain geometry, the differences in Ramachandran angles were calculated between  
315 corresponding residues in the wild type and Arg<sup>57</sup>→Ala crystal structures (**Figure 5c**). The top  
316 peak in this difference Ramachandran plot, i.e., peak 1, in this analysis corresponds to a  
317 substantial main chain twist at Gly<sup>72</sup>, which is in the neighborhood of the Arg<sup>57</sup>→Ala mutation.  
318 This conformational change is associated with the Asp<sup>73</sup> side chain rotation a repositioning of the  
319 main chain atoms from Gly<sup>72</sup> to Val<sup>77</sup>, which are pushed away from the domain core consistent  
320 with the reorientation of the Asp<sup>73</sup> side chain (**Figure 5d**). Peaks 2 and 4 in this difference  
321 Ramachandran plot correspond to changes in surface loops that are 19Å and 25Å from the  
322 mutation site and are likely due to crystal contacts. Peaks 3 and 6 correspond to main chain  
323 rearrangement in the mutation site, i.e., Arg<sup>57</sup>→Ala. This is likely a combination of the mutation  
324 and modifications to side chain rearrangements in the neighborhood of Ala<sup>57</sup> described above.  
325 Peak 5 is associated with a surface loop 31Å from the mutation site. This loop demonstrates weak  
326 electron density and is only partly ordered. Hence, three of the top six peaks, i.e., 1, 3, and 6, in  
327 this analysis are associated with considerable rearrangement of the αCOPI-WD40 surface upon  
328 the mutation of basic Arg<sup>57</sup> to neutral Ala including the site for spike hepta-peptide binding.

329 In contrast to the Arg<sup>57</sup>→Ala substitution, the crystal structure of αCOPI-WD40 Tyr<sup>139</sup>→Ala  
330 mutant demonstrated no significant changes as compared to the wild-type structure (**Figure 5c**,  
331 **5e**). No major rearrangements of side chains or main chains were observed. This lack of  
332 conformational rearrangement contrasts with the structural changes in the αCOPI-WD40 Arg<sup>57</sup>  
333 →Ala mutant structure. It is likely that the electroneutral change from Tyr<sup>139</sup> to Ala does not perturb  
334 the local electrostatic surface sufficiently to alter protein conformation. Hence, disruption of spike  
335 hepta-peptide binding in this Tyr<sup>139</sup>→Ala mutant is due to the loss of a single side chain hydroxyl  
336 group. Collectively, the crystal structures of αCOPI-WD40 Arg<sup>57</sup>→Ala and Tyr<sup>139</sup>→Ala mutants  
337 reveal distinct and contrasting structural principles by which spike hepta-peptide binding is  
338 disrupted.

339 An analysis of crystal packing in the αCOPI-WD40 structures reported here showed that  
340 the peptide binding site residues are in contact with symmetry related chains. We subsequently  
341 asked if distinct crystal packing may have contributed to these different structural consequences

342 of Arg<sup>57</sup>→Ala and Tyr<sup>139</sup>→Ala mutations. However, similar crystal packing interactions are  
343 provided by residues His<sup>267</sup> and Lys<sup>309</sup> from a symmetry-related αCOPI-WD40 chain to the spike  
344 hepta-peptide binding site. As such, conformational differences in these two αCOPI-WD40  
345 mutants are due to altered interaction chemistry in the hepta-peptide binding site.

346

### 347 **Conservation of αCOPI-WD40 residues critical for spike hepta-peptide binding**

348 The mutagenesis, BLI, and crystallographic analyses described here are focused on  
349 αCOPI. Hence, we asked if αCOPI Arg<sup>57</sup>, Asp<sup>115</sup>, and Tyr<sup>139</sup> residues are conserved in bats,  
350 pangolins, camels, and humans, which have been implicated as zoonotic reservoirs and hosts for  
351 β-coronaviruses (Bolles et al., 2011; Han et al., 2016; Latinne et al., 2020; Roess et al., 2016;  
352 Zhang et al., 2020). Overall, αCOPI is 98.5-99.1% identical in these multicellular higher organisms  
353 (**SI Table T3**). In contrast, αCOPI conservation is relatively moderate between these organisms  
354 and yeast at 46.8-47.1% sequence identity. However, all three αCOPI residues critical for spike  
355 hepta-peptide binding, i.e., Arg<sup>57</sup>, Asp<sup>115</sup>, and Tyr<sup>139</sup>, are found to be 100% identical in yeast, bat,  
356 pangolin, camel, and human αCOPI. This suggests a conserved role of these three residues in  
357 binding dibasic motifs in host proteins, which is exploited by the sarbecovirus spike to hijack the  
358 host COPI machinery. αCOPI residues such as Lys<sup>15</sup> and His<sup>31</sup> that are suggested to be involved  
359 in spike hepta-peptide binding by our *in silico* analysis demonstrate complete conservation.  
360 Interestingly, this conservation extends to *S. cerevisiae* β'COPI wherein αCOPI residues Arg<sup>57</sup>  
361 and Asp<sup>115</sup> are replaced by Arg<sup>59</sup> and Asp<sup>117</sup> in β'COPI, respectively. However, αCOPI Tyr<sup>139</sup> is  
362 semi-conserved and is replaced by Phe<sup>142</sup> in β'COPI.

363

### 364 **Discussion**

365 The trafficking of sarbecovirus spike protein during progeny virus assembly consists of  
366 three distinct steps, i.e., spike-COPI binding in donor membranes such as cis-Golgi, inter-  
367 organelle trafficking, and dissociation of spike-COPI at the destination, which is ERGIC  
368 (Klumperman et al., 1994). This trafficking pathway can be disrupted by either weakening of spike-  
369 COPI binding leading to premature complex dissociation or enhanced stability of this complex,  
370 which interferes with spike release. This is supported by recent cellular imaging and biochemical  
371 analysis of the SARS-CoV-2 spike protein (Jennings et al., 2021). Hence, elucidating the  
372 determinants of spike-COPI interactions is fundamental to understanding sarbecovirus assembly.

373 Employing a spike hepta-peptide and a purified αCOPI-WD40 domain, the present  
374 investigation expounds on the biophysical and structural bases of spike-COPI interactions. We  
375 demonstrate that direct binding of purified αCOPI-WD40 domain to the SARS-CoV-2 spike hepta-

376 peptide is modulated by an extended coatomer binding motif that stretches beyond the spike K-  
377 x-H residues. Our data show that residues such as acidic Glu in the C-terminal position in the  
378 spike likely interact with complementary charged basic residues in  $\alpha$ COPI-WD40. This interaction  
379 strengthens spike binding to the host  $\alpha$ COPI. This analysis is consistent with a recent preprint  
380 that shows a key role of this SARS-CoV-2 spike C-terminal position in pull-down assays of the  
381 spike cytosolic domain with COPI subunits (Cattin-Ortolá et al., 2021). A second cellular  
382 investigation has recently shown that the inferred stabilization of the spike-COPI complex by a  
383 Lys<sup>1269</sup>-x-His<sup>1271</sup>→Lys<sup>1269</sup>-x-Lys<sup>1271</sup> spike mutation has dramatic effects on SARS-CoV-2 spike  
384 processing and trafficking (Jennings et al., 2021). This functional analysis suggests a key role of  
385 spike-COPI complex dissociation in modulating spike trafficking and function. Hence, it is likely  
386 that residues that strengthen spike-COPI complex stability beyond that from wild type interactions  
387 are avoided in the spike C-terminus. This includes acidic Glu and unbranched Ala residue that  
388 stabilize the  $\alpha$ COPI-WD40 domain as demonstrated in the present investigation. Interestingly, our  
389 analysis of the human membrane proteome suggests that the occurrence of a charged residue  
390 such as Glu and  $\beta$ -branched residues is a high probability event at the C-terminus of dibasic  
391 motifs. This raises an intriguing question of whether such charged residues present a structural  
392 and biophysical disadvantage to spike-COPI interactions, and hence, are selected against in  
393 sarbecoviruses. Such a highly stabilized complex may not undergo dissociation in ERGIC to  
394 release the spike for processing and downstream virion assembly. Although our investigation  
395 does not probe this interesting question in sarbecovirus evolution, we note that complex formation  
396 of Glu<sup>1273</sup> or Gln<sup>1283</sup> containing spike hepta-peptide is substantially slower than in the wild type.  
397 Even Arg<sup>1273</sup>, which lacks charge complementarity with  $\alpha$ COPI-WD40 residues shows slower  
398 association kinetics. Glu, Gln, and Arg have long side chains unlike Thr<sup>1273</sup>, which is suggestive  
399 of a role of side chain size in modulating interactions with COPI. As suggested previously,  $\beta$ -  
400 branching presents steric restrictions on protein-protein binding (Ma and Goldberg, 2013). Hence,  
401 Thr<sup>1273</sup> likely presents a means to enhance spike-COPI dissociation. Here, it is significant to note  
402 that although  $\alpha$ COPI-WD40 and  $\beta$ 'COPI-WD40 domains have high structural similarity (Ma and  
403 Goldberg, 2013), our data demonstrate selectivity of the sarbecovirus hepta-peptide in favor of  
404  $\alpha$ COPI-WD40. This is consistent with the binding selectivity of the PEDV hepta-peptide for  
405  $\alpha$ COPI-WD40 (Ma and Goldberg, 2013) and likely points to a functional role of  $\alpha$ COPI in  
406 coronavirus biogenesis.

407 In the context of electrostatics of spike-COPI interactions, acidification of the cytosol is  
408 reported preceding apoptosis, which is associated with  $\beta$ -coronavirus infections (Gottlieb et al.,  
409 1996; Li et al., 2020a; Yan et al., 2004). More recently, investigations have suggested the

410 involvement of elevated lactate levels in COVID-19, which are associated with lowered pH (Li et  
411 al., 2020b). Our investigation demonstrates a role of acidic pH in strengthening spike hepta-  
412 peptide binding to  $\alpha$ COPI-WD40, which is consistent with prior cellular data (McBride et al., 2007).  
413 The protonation of His<sup>1271</sup> residue in the spike dibasic motif upon acidification likely contributes to  
414 this strengthened binding. It is intriguing that the spike cytosolic domain is highly enriched in  
415 charged residues that would respond to pH changes. Concurrently, the dibasic motif binding  
416 surface of  $\alpha$ COPI and  $\beta'$ COPI demonstrates clustering of charged residues that would be  
417 responsive to pH modifications.

418 Our investigation identifies three  $\alpha$ COPI residues Arg<sup>57</sup>, Asp<sup>115</sup>, and Tyr<sup>139</sup>, as essential  
419 for spike hepta-peptide binding. These  $\alpha$ COPI residues are completely conserved across  
420 organisms associated with  $\beta$ -coronavirus infections such as bats, pangolins, camels, and  
421 humans. Importantly, the spike dibasic motif and adjacent residues demonstrate complete  
422 conservation in  $\beta$ -coronavirus isolates from bats, pangolins, civets, camels, and humans (Ge et  
423 al., 2013; Guan et al., 2003; Lau et al., 2005; Li et al., 2005; Raj et al., 2014; Tang et al., 2006;  
424 Xiao et al., 2020). This is suggestive of a likely conserved COPI interaction mechanism for spike  
425 binding, and more broadly of dibasic motifs, in these organisms. Interestingly, the critical  $\alpha$ COPI  
426 residues identified in the present analysis are broadly consistent with a prior genetic and  
427 biophysical study that implicated  $\alpha$ COPI Arg<sup>57</sup> and Lys<sup>15</sup>, and  $\beta'$ COPI Arg<sup>59</sup> and Asp<sup>117</sup> (equivalent  
428 to  $\alpha$ COPI Asp<sup>115</sup>) as critical for dibasic motif binding, retrograde trafficking, and growth of yeast  
429 cells (Jackson et al., 2012).

430 Building on this prior investigation, our crystallographic analysis of  $\alpha$ COPI Arg<sup>57</sup>→Ala and  
431 Tyr<sup>139</sup>→Ala mutants presents two complementary structural results to substantially advance the  
432 understanding of how these residues are critical for COPI architecture. The  $\alpha$ COPI Arg<sup>57</sup>→Ala  
433 mutant demonstrates a rearrangement of the spike hepta-peptide binding site and of neighboring  
434 residues whereas the Tyr<sup>139</sup>→Ala mutant structure is largely similar to the wild type  $\alpha$ COPI  
435 structure. Yet, both mutants demonstrate the same functional outcome, i.e., loss of spike hepta-  
436 peptide binding. Given this structural sensitivity of  $\alpha$ COPI, and presumably  $\beta'$ COPI, to changes in  
437 electrostatics, this raises an interesting question about the structural basis of how mutations in  
438 these subunits alter normal retrograde trafficking. It is relevant to note that the *COPA* gene, which  
439 encodes the human homolog of  $\alpha$ COPI, has been implicated in a set of clinical disorders  
440 collectively known as the COPA syndrome (Vece et al., 2016; Watkin et al., 2015). Here, mis-  
441 sense mutations including ones that modify side chain charge in the WD40 domains compromise  
442 COPA protein function in retrograde trafficking (Watkin et al., 2015). Based on data presented

443 here, it would be of interest to investigate the structural basis of this dysfunction to gain deeper  
444 insights into COPI biology.

445 In conclusion, our present analysis and supporting prior investigations demonstrate that  
446 the extended dibasic motif in the sarbecovirus spike functions as an effective tool to hijack the  
447 COPI complex involved in retrograde trafficking. In broader terms, our structural analysis provides  
448 a basis to further investigate the structural and functional consequences of  $\alpha$ COPI and  $\beta$ 'COPI  
449 mutations in disrupting retrograde trafficking.

450

## 451 **Methods**

### 452 **Protein and peptide production**

453 The *S. pombe*  $\alpha$ COPI-WD40 domain was synthesized by TOPGENE and cloned in  
454 pcDNA3.1(+) with a C-terminal strep-tag for affinity purification. Five mutations (Leu<sup>181</sup>→Lys,  
455 Leu<sup>185</sup>→Lys, Ile<sup>192</sup>→Lys, Leu<sup>196</sup>→Lys and Phe<sup>197</sup>→Lys) were incorporated in the gene to improve  
456 solubility as suggested previously (Ma and Goldberg, 2013). Expression was performed in  
457 Expi293 mammalian cells using the Thermo Fisher ExpiFectamine expression kit. Protein  
458 purification was performed by affinity chromatography of the clarified cellular lysate followed by  
459 SEC in a Superdex 75 chromatography column. Arg<sup>57</sup>→Ala, Asp<sup>115</sup>→Ala, and Tyr<sup>139</sup>→Ala mutants  
460 of  $\alpha$ COPI-WD40 domain were expressed and purified as described for the wild type protein. The  
461 purified  $\alpha$ COPI-WD40 domain in 150 mM NaCl, 5 mM dithiotreitol (DTT), 10% glycerol, and either  
462 20 mM Tris-HCl (pH 7.5) or 50 mM MES-NaOH (pH 6.5) was flash-frozen in liquid nitrogen until  
463 further experimentation.

464  $\beta$ 'COPI-WD40 (residues 1-304) from *Saccharomyces cerevisiae* was cloned in pGEX-6P-  
465 1 vector and expressed overnight in *E. coli* pLysS cells at 18°C. This GST fusion protein was  
466 purified by affinity chromatography and SEC in 150 mM NaCl, 5 mM dithiotreitol (DTT), 10%  
467 glycerol, and 50 mM MES-NaOH (pH 6.5) and was flash-frozen in liquid nitrogen until further  
468 experimentation.

469 Peptide synthesis was performed by Biomatik (USA) with an N-terminal biotin tag and a  
470 (PEG)<sub>4</sub> linker between the tag and the peptide. No modification was performed at the C-terminus  
471 of the peptides thereby leaving a free terminal carboxylate group.

### 472 **BLI assay**

473 Biotinylated spike hepta-peptides were tethered to streptavidin (SA) biosensors (FortéBio)  
474 in a 96-well plate format. Purified  $\alpha$ COPI-WD40 domain was provided as the analyte. Kinetics  
475 measurements for determination of binding affinity were performed on an Octet RED96 system  
476 (FortéBio). Data acquisition was carried out using the Data Acquisition 11.1 suite. Briefly, SA  
477 biosensors were hydrated in 200  $\mu$ L of kinetics buffer (20mM Tris-HCl (pH 7.5) or 50 mM MES-  
478 NaOH (pH 6.5), 150 mM NaCl, 5 mM DTT, 10% glycerol, 0.2 mg/ml bovine serum albumin (BSA),  
479 and 0.002% Tween 20) for 10 minutes prior to binding. The spike hepta-peptide (5  $\mu$ g/ml) was  
480 loaded on the biosensors for 15 seconds. A baseline was established by rinsing the biosensor  
481 tips in the kinetic buffer for 30 seconds. This was followed by association with  $\alpha$ COP in varying  
482 concentrations over 60 seconds and dissociation in the baseline well for 90 seconds. A  
483 temperature of 25°C and a shake speed of 1000 rpm was maintained during acquisition. All  
484 experiments were carried out in triplicates. A new sensor was used for each replicate. Data  
485 processing and analysis were performed in the FortéBio Data Analysis 11.1 software suite. Raw  
486 data was subtracted from the 0  $\mu$ M  $\alpha$ COP signal as a reference. The baseline step immediately  
487 before the association step was used for the alignment of the y-axis. An inter-step correction  
488 between the association and dissociation steps was performed. Reference subtracted curves  
489 were processed with the Savitzky-Golay filtering method and subjected to global fitting using a  
490 1:1 binding model. All fits to BLI data had  $R^2$  value (goodness of fit) >0.9.

#### 491 **Crystallization and structure determination**

492 Purified  $\alpha$ COPI-WD40 domain was concentrated to 2 mg/ml in 20 mM Tris-HCl (pH 7.5),  
493 150 mM NaCl, 5 mM DTT and 10% glycerol buffer. Crystal trays were set up with the hanging  
494 drop vapor diffusion method with 0.5  $\mu$ L of  $\alpha$ COPI-WD40 mixed with an equal volume of reservoir  
495 buffer. Crystals were within 48 hours at 22°C in 20% PEG3350 and 0.25 M sodium citrate tribasic  
496 dihydrate. Crystals were cryo-protected in mother liquor supplemented with 20% ethylene glycol  
497 and flash-frozen in liquid nitrogen. Purified Arg<sup>57</sup>→Ala and Tyr<sup>139</sup>→Ala mutants of  $\alpha$ COP were  
498 concentrated to ~2.2 mg/ml and crystallized as described for the wild type protein. Crystals for  
499 Arg<sup>57</sup>→Ala were obtained in 22% PEG3350 and 0.2 M trisodium citrate and for Tyr<sup>139</sup>→Ala in 18%  
500 PEG3350 and 0.2M potassium-sodium tartrate. The crystals for Arg<sup>57</sup>→Ala and Tyr<sup>139</sup>→Ala  
501  $\alpha$ COPI-WD40 mutants were cryoprotected in 20% glycerol and 20% ethylene glycol, respectively.  
502 X-ray diffraction data for wild-type  $\alpha$ COPI-WD40 was collected at the beamline GM/CA 23-ID-D  
503 of the Advanced Photon Source at the Argonne National Laboratory and at the National  
504 Synchrotron Light Source II (NSLS II) beamline 17-ID-1 AMX at the Brookhaven National  
505 Laboratory for the mutants. The X-ray diffraction data for the wild type protein crystals was



506 indexed, integrated and scaled using HKL3000 (Minor et al., 2006) whereas those for the mutants  
507 were processed using XDS (Kabsch, 2010) as part of the data acquisition and processing pipeline  
508 at the beamline. The data processing statistics are given in **Table 1**. The scaled data were merged  
509 using AIMLESS in CCP4 suite (Evans and Murshudov, 2013). Molecular replacement was  
510 performed in Phenix using a previously determined  $\alpha$ COPI-WD40 domain structure (PDB ID 4J87)  
511 as the search model (McCoy et al., 2007; Rossmann and Blow, 1962). Iterative model building  
512 and refinement were performed in Phenix.refine (Afonine et al., 2012) and Coot (Emsley and  
513 Cowtan, 2004). Figures were generated in PyMol. Part of the software used here was curated by  
514 SBGrid (Morin et al., 2013).

### 515 **Analysis of Ramachandran angles**

516 The crystal structures of wild type, Arg<sup>57</sup>→Ala, and Tyr<sup>139</sup>→Ala  $\alpha$ COPI-WD40 were  
517 analyzed in Molprobit (Williams et al., 2018). For each structure pair, i.e., wild type with  
518 Arg<sup>57</sup>→Ala or wild type with Tyr<sup>139</sup>→Ala, per residue difference in Ramachandran angles was  
519 determined using equation [1]-

$$520 \quad (\delta = \sqrt{((\psi_{WT} - \psi_m)^2 + (\phi_{WT} - \phi_m)^2)}) [1]$$

521 Here, Ramachandran angles for wild type and mutant structures are represented as  $(\psi_{WT}, \phi_{WT})$   
522 and  $(\psi_m, \phi_m)$  respectively. Each structure-pair was superimposed in PyMol and inspected to  
523 ensure consistency with the results of the Ramachandran angle analysis. We identified three  
524 instances of surface exposed residues (Asp<sup>96</sup>, Asn<sup>257</sup> in the wild type coordinates, and Ser<sup>11</sup> in  
525 Arg<sup>57</sup>→Ala coordinates) where the structures were highly similar between corresponding main  
526 chain atoms in the wild type and mutant but the sign of a dihedral angle close to 180° had been  
527 flipped. The C $\alpha$  rmsd of short penta-residue stretches of the polypeptide chain centered at each  
528 of these residues was 0.14Å, 0.06Å, and 0.18Å, respectively. The signs of the Ramachandran  
529 angles for these residues were corrected manually.

### 530 ***In silico* analysis of sarbecovirus spike hepta-peptide with $\alpha$ COPI-WD40**

531 Structural modeling of the SARS-CoV-2 spike C-terminus peptide (sequence: GVKLHYT)  
532 in complex with the  $\alpha$ COPI-WD40 domain was performed using homology modeling in Modeller  
533 (Webb and Sali, 2014) and the structure of the  $\alpha$ COP-WD40 complexed with Emp47p peptide  
534 (PDB ID 4J8B) as a template. Prior to computational mutagenesis, models were processed with  
535 FastRelax (Conway et al., 2014) in Rosetta (v. 3.5), with backbone and side chain atoms

536 constrained to the input coordinates. The command line parameter settings for FastRelax  
537 execution (“relax” executable) used were:

538 -relax:constrain\_relax\_to\_start\_coords

539 -relax:coord\_constrain\_sidechains

540 -relax:ramp\_constraints false

541 -ex1

542 -ex2

543 -use\_input\_sc

544 -correct

545 -no\_his\_his\_pairE

546 -no\_optH false

547 -flip\_HNQ

548 -nstruct 1

549 Computational mutagenesis simulations to predict effects on binding affinities ( $\Delta\Delta G$ s) for  
550 point substitutions were performed using a previously described protocol implemented in Rosetta  
551 (v. 2.3) (Kortemme and Baker, 2002). Default parameters were used, with the exception of extra  
552 rotamers allowed during packing of modeled side chains, specified by command line parameters:

553 -extrachi\_cutoff 1 -ex1 -ex2 -ex3

#### 554 **Sequence analysis of dibasic motifs in the human membrane proteome**

555 UNIPROT identifiers of secreted and membrane-bound human proteins, as well as  
556 secreted/membrane-bound protein isoforms, were downloaded from the Human Protein Atlas  
557 (<http://www.proteinatlas.org>) (Thul et al., 2017). The corresponding protein sequences were  
558 obtained from UNIPROT, leading to approximately 6800 sequences, which were parsed using an  
559 in-house Perl script to identify C-terminal motif residues. Of these, 119 sequences that

560 demonstrated a C-terminal dibasic motif were analyzed further for amino acid propensities in the  
561 dibasic motif and neighboring residues.

562 **Accession numbers of protein sequences used in this investigation**

563  $\alpha$ COPI (yeast, NP\_595279.1; bat, XP\_031291824.1; pangolin, XP\_031291824.1; camel,  
564 XP\_031291824.1; human, P53621),  $\beta$ 'COPI (yeast, Q96WV5), spike protein (bat coronavirus  
565 279/2005, Q0Q475; bat coronavirus Rp3/2004, Q3I5J5; bat coronavirus HKU3, Q3LZX1; bat  
566 SARS-like coronavirus WIV1, KC881007.1; pangolin coronavirus isolate, MT799526.1; civet  
567 SARS-CoV isolate SZ3, AY304486.1; MERS coronavirus isolate camel/Qatar\_2\_2014,  
568 KJ650098.1; MERS-CoV, K9N5Q8; SARS-CoV, P59594; SARS-CoV-2, P0DTC2).

569 **Table 1: Crystallographic data and refinement statistics**

| Structure                                   | $\alpha$ COPI-WD40 WT                                                | $\alpha$ COPI-WD40 Arg <sup>57</sup> →Ala                          | $\alpha$ COPI-WD40 Tyr <sup>139</sup> →Ala                          |
|---------------------------------------------|----------------------------------------------------------------------|--------------------------------------------------------------------|---------------------------------------------------------------------|
| PDB ID                                      | 7S22                                                                 | 7S16                                                               | 7S23                                                                |
| X-ray Source                                | 23-ID-D                                                              | AMX 17-ID-1                                                        | AMX 17-ID-1                                                         |
| Wavelength (Å)                              | 1.03                                                                 | 0.92                                                               | 0.92                                                                |
| Temperature (K)                             | 100                                                                  | 100                                                                | 100                                                                 |
| Space group                                 | P 1 2 <sub>1</sub> 1                                                 | P 1 2 <sub>1</sub> 1                                               | P1 2 <sub>1</sub> 1                                                 |
| Unit cell (Å, °)                            | a= 36.99, b=171.82, c=71.42; $\alpha$ = $\gamma$ =90, $\beta$ =99.57 | a=35.87, b=56.71, c=70.55; $\alpha$ = $\gamma$ =90, $\beta$ =99.37 | a=37.31, b=171.55, c=71.28; $\alpha$ = $\gamma$ =90, $\beta$ =99.71 |
| Resolution (Å)                              | 44.44-1.75 (1.78-1.75)                                               | 69.61-1.24 (1.26-1.24)                                             | 171.55 -1.49 (1.52-1.49)                                            |
| <sup>a</sup> R <sub>merge</sub> (%)         | 9.2 (54.7)                                                           | 5.4 (57.9)                                                         | 8.6(71.9)                                                           |
| <I/ $\sigma$ (I)>                           | 8.3 (2.2)                                                            | 11.5 (1.6)                                                         | 5.0 (1.1)                                                           |
| CC1/2 (%)                                   | 98.1 (65.3)                                                          | 99.8 (66.3)                                                        | 99.6 (67.0)                                                         |
| No. of reflections                          | 196291 (10446)                                                       | 319698 (6270)                                                      | 502939 (25265)                                                      |
| No. of unique reflections                   | 85435 (4461)                                                         | 74665(2292)                                                        | 140251 (6840)                                                       |
| Completeness (%)                            | 97.0 (95.4)                                                          | 94.2 (58.9)                                                        | 97.9 (96.8)                                                         |
| Redundancy                                  | 2.3 (2.3)                                                            | 4.3 (2.7)                                                          | 3.6 (3.7)                                                           |
| <b>Refinement Statistics</b>                |                                                                      |                                                                    |                                                                     |
| Resolution (Å)                              | 44.48-1.75 (1.79-1.75)                                               | 43.97-1.24 (1.26-1.24)                                             | 65.02-1.49 (1.51-1.49)                                              |
| No. of reflections (F>0) used in refinement | 81123 (2645)                                                         | 74567 (1653)                                                       | 140153 (4335)                                                       |
| <sup>b</sup> R <sub>work</sub> (%)          | 17.3                                                                 | 13.5                                                               | 14.0                                                                |
| <sup>c</sup> R <sub>free</sub> (%)          | 21.4                                                                 | 15.9                                                               | 18.4                                                                |
| RMS bond length (Å)                         | 0.007                                                                | 0.005                                                              | 0.005                                                               |
| RMS bond angle (°)                          | 0.938                                                                | 0.910                                                              | 0.696                                                               |

|                                                 |      |      |      |
|-------------------------------------------------|------|------|------|
| Overall B value (Å <sup>2</sup> )               | 21.1 | 21.8 | 21.7 |
| <b>Ramachandran Plot Statistics<sup>d</sup></b> |      |      |      |
| Residues                                        | 924  | 321  | 923  |
| Favored (%)                                     | 96.1 | 95.6 | 95.8 |
| Allowed (%)                                     | 3.8  | 4.4  | 4.2  |
| Disallowed (%)                                  | 0.1  | 0.0  | 0.0  |

570 <sup>a</sup> $R_{\text{merge}} = [\sum h \sum i |I_h - \bar{I}_h| / \sum h \sum i I_h]$  where  $\bar{I}_h$  is the mean of  $I_h$  observations of reflection  $h$ .  
571 Numbers in parenthesis represent highest resolution shell. <sup>b</sup> $R_{\text{work}}$  and <sup>c</sup> $R_{\text{free}} = \sum ||F_{\text{obs}}| - |F_{\text{calc}}|| /$   
572  $\sum |F_{\text{obs}}| \times 100$  for 95% of recorded data ( $R_{\text{work}}$ ) or 5% data ( $R_{\text{free}}$ ). <sup>d</sup>From MolProbity(Williams et  
573 al., 2018).

574 **Table 2: *In silico* mutagenesis of extended dibasic motif in SARS-CoV-2 spike**

| <b>Spike hepta-peptide mutation</b> | <b>Change in interaction energy (<math>\Delta\Delta G</math>, Rosetta units)<sup>1</sup></b> | <b>Predicted binding change with <math>\alpha</math>COPI-WD40</b> |
|-------------------------------------|----------------------------------------------------------------------------------------------|-------------------------------------------------------------------|
| Lys <sup>1269</sup> →Ala            | 1.9                                                                                          | Weakened                                                          |
| Leu <sup>1270</sup> →Ala            | 0.1                                                                                          | Moderate effect                                                   |
| His <sup>1271</sup> →Ala            | 1.4                                                                                          | Weakened                                                          |
| Tyr <sup>1272</sup> →Ala            | 0.8                                                                                          | Weakened                                                          |
| Thr <sup>1273</sup> →Ala            | 0.1                                                                                          | Moderate to no effect                                             |
| Thr <sup>1273</sup> →Glu            | -1.4                                                                                         | Strengthened                                                      |

575

576 <sup>1</sup>Rosetta energy unit  $\Delta\Delta G$  values correspond approximately to energies in kcal/mol, as seen in  
577 previous studies (Kortemme and Baker, 2002; Pierce et al., 2014), therefore predicted moderate  
578 disruptive substitutions have scores > 0.6 and highly disruptive substitutions have scores > 1.2,  
579 while predicted substantial improved binding corresponds to scores < -1.2.

580 **Table 3: Interaction residues in *in silico* model of spike hepta-peptide with  $\alpha$ COPI-WD40**

| Residue in SARS-CoV-2 spike hepta-peptide | $\alpha$ COPI-WD40 contact residue within 3.5Å                                                                          |
|-------------------------------------------|-------------------------------------------------------------------------------------------------------------------------|
| Lys <sup>1269</sup>                       | Asp <sup>96</sup> , Asp <sup>115</sup> , Tyr <sup>139</sup>                                                             |
| Leu <sup>1270</sup>                       | Arg <sup>99</sup>                                                                                                       |
| His <sup>1271</sup>                       | Arg <sup>57</sup> , Arg <sup>99</sup> , Met <sup>141</sup> , Leu <sup>157</sup> , Asn <sup>216</sup>                    |
| Tyr <sup>1272</sup>                       | His <sup>31</sup> , Arg <sup>57</sup>                                                                                   |
| Thr <sup>1273</sup>                       | Arg <sup>13</sup> , Lys <sup>15</sup> , His <sup>31</sup> , Arg <sup>57</sup> , Arg <sup>300</sup> , Trp <sup>302</sup> |

581

582 **Table 4: Effects of *in silico*  $\alpha$ COPI-WD40 mutagenesis on spike hepta-peptide binding**

| $\alpha$ COPI-WD40 mutation | Change in interaction energy ( $\Delta\Delta G$ , Rosetta Units) | Predicted binding change with $\alpha$ COPI-WD40 |
|-----------------------------|------------------------------------------------------------------|--------------------------------------------------|
| Lys <sup>15</sup> →Ala      | 0.8                                                              | Weakened                                         |
| His <sup>31</sup> →Ala      | 0.8                                                              | Weakened                                         |
| Arg <sup>57</sup> →Ala      | 1.2                                                              | Weakened                                         |
| Asp <sup>115</sup> →Ala     | 0.9                                                              | Weakened                                         |
| Tyr <sup>139</sup> →Ala     | 1.1                                                              | Weakened                                         |

583



## 584 Figure Legends

### 585 **Figure 1: Direct binding interaction of sarbecovirus spike hepta-peptide with $\alpha$ COPI-WD40.**

586 **(a)** Structural conservation of  $\alpha$ COPI-WD40 domain determined in the present investigation  
587 (yellow) and a previous structure (magenta). Arrow highlights main chain differences between  
588 these two  $\alpha$ COPI-WD40 structures in Gly<sup>168</sup>-Ala<sup>188</sup>. **(b)** Conservation of dibasic motif in spike C-  
589 terminii of SARS-CoV, SARS-CoV-2, and MERS-CoV-2. The basic Lys and His residues are  
590 highlighted in blue. **(c-i)** BLI assay of N-biotinylated spike hepta-peptide with  $\alpha$ COPI-WD40  
591 domain. One representative experiment of three is shown in panels **(c, f, g)**. Color code for  
592 concentrations is given at the bottom of the figure. **(c)** The spike wild type peptide sequence  
593 demonstrates dose-dependent binding to  $\alpha$ COPI-WD40 domain. **(d, e)** Mean values of equilibrium  
594 and kinetic  $K_D$  are shown. **(f)** Scrambling of the hepta-peptide sequence abolishes binding  
595 suggesting sequence-specific interaction. **(g)** Acidification enhances binding between the wild  
596 type spike hepta-peptide and  $\alpha$ COPI-WD40 domain. **(h, i)** Rate constants for complex association  
597 and dissociation are shown. The error bars represent the standard error and "n.d." implies not  
598 determined for weak interactions.

599

### 600 **Figure 2: Structure-guided mutagenesis of spike hepta-peptide and binding analysis with**

601  **$\alpha$ COPI-WD40 domain. (a)** *In silico* model of the spike hepta-peptide complexed with  $\alpha$ COPI-  
602 WD40 domain (yellow surface). The hepta-peptide is shown as a ribbon in rainbow colors from N  
603 (blue) to C (red) terminus. The C $\alpha$ -atoms in the hepta-peptide are shown as spheres. The side  
604 chains of residues that interact with  $\alpha$ COPI-WD40 are shown as a stick. **(b-k)** BLI analysis of  
605  $\alpha$ COPI-WD40 binding to spike hepta-peptide mutants. The color code of BLI traces is given at the  
606 bottom of the figure. One representative experiment of three is shown. The mutation in the spike  
607 hepta-peptide sequence is highlighted in bold and is underlined. Mutagenesis of, **(b)** Lys<sup>1269</sup>, **(c)**  
608 His<sup>1271</sup>, or **(d)** both abolishes binding to  $\alpha$ COPI-WD40. **(e)** In contrast, Tyr<sup>1272</sup>→Ala mutation only  
609 weakens binding to  $\alpha$ COPI-WD40. The middle panel shows weak binding of  $\alpha$ COPI-WD40  
610 domain with a hepta-peptide wherein Lys<sup>1269</sup> has been mutated to Ala. Panels **(f-i)** show a  
611 comparative analysis of  $K_D$  and rate constants for these mutants. **(j)** Mutagenesis of Thr<sup>1273</sup> to Ala  
612 in the spike hepta-peptide leads to moderately enhanced binding to  $\alpha$ COPI-WD40 whereas  
613 mutagenesis to Val<sup>1273</sup> weakens binding **(k)**. In panels **(f-i)**, the error bars represent the standard  
614 error and "n.d." implies not determined for weak interactions. For reference, the values of kinetic  
615 and equilibrium constants for the wild type hepta-peptide sequence ("WT") are shown from **Figure**  
616 **1.**

617

618 **Figure 3: *In silico* and biophysical analysis of spike C-terminal position in  $\alpha$ COPI-WD40**  
619 **binding. (a)** Sequence logo generated from the alignment of K-x-H(K)-x-x sequence in 119  
620 proteins predicted to be in the human membrane proteome. This shows the abundance of Lys in  
621 the first and third positions, low frequency of aromatic residues in the penultimate position, and  
622 the abundance of Asp and Glu in the C-terminal position. **(b)** An *in silico* model of the spike hepta-  
623 peptide on  $\alpha$ COPI-WD40 (yellow surface) shows an abundance of basic residues in the vicinity  
624 of the terminal Thr<sup>1273</sup> spike residue. Panels **(c-i)** show results of a BLI analysis of binding between  
625 spike hepta-peptide mutants and  $\alpha$ COPI-WD40. Stabilization of the spike hepta-peptide  
626 complexed with  $\alpha$ COPI-WD40 is observed when the terminal position contains either, **(c)** acidic  
627 Glu<sup>1273</sup>, or **(d)** neutral Gln<sup>1273</sup> residue. **(e)** In contrast, basic Arg<sup>1273</sup> in the spike hepta-peptide does  
628 not favor enhanced binding. Panels **(f-i)** show  $K_D$  and rate constants for these assays. These data  
629 implicate a role of this terminal hepta-peptide position in modulating tight binding to  $\alpha$ COPI-WD40.  
630 In **(c-e)**, one representative experiment of three is shown. The error bars in **(f-i)** represent the  
631 standard error and "n.d." implies not determined for weak interactions. For reference, the values  
632 of equilibrium and rate constants for the wild type hepta-peptide sequence ("WT") are shown from  
633 **Figure 1.**

634

635 **Figure 4: Structure-guided mutagenesis of  $\alpha$ COPI-WD40 domain and binding analysis with**  
636 **spike hepta-peptide.** Panels **(a-c)** highlight the hepta-peptide interactions (within 4Å) of **(a)** Arg<sup>57</sup>,  
637 **(b)** Asp<sup>115</sup>, and **(c)** Tyr<sup>139</sup> residues in  $\alpha$ COPI-WD40 in an *in silico* model. These three interacting  
638  $\alpha$ COPI-WD40 residues are shown as yellow-red-blue sticks whereas the other residues are  
639 shown as a yellow surface for simplicity. The corresponding interacting residues in the spike  
640 hepta-peptide are labelled and shown as green-red-blue sticks and spheres for C $\alpha$  atoms. The  
641 BLI analysis of Arg<sup>57</sup>→Ala, Asp<sup>115</sup>→Ala, and Tyr<sup>139</sup>→Ala mutants with the wild type spike hepta-  
642 peptide is shown in panels **(d)**, **(e)**, and **(f)** respectively. All three mutants demonstrate no  
643 substantial binding of the spike hepta-peptide. One representative experiment of three is shown  
644 in panels **(d-f)**.

645

646 **Figure 5: Crystallographic analysis  $\alpha$ COPI-WD40 Arg<sup>57</sup>→Ala and Tyr<sup>139</sup>→Ala mutants. (a)**  
647 Electron density around the side chains of residues Ala<sup>57</sup>, Asp<sup>73</sup>, and Tyr<sup>97</sup> (blue mesh, 2Fo-Fc  
648 map contoured at 1.0  $\sigma$ ) in the structure of the Arg<sup>57</sup>→Ala mutant. For simplicity, other residues  
649 are shown as a yellow surface. **(b)** Conformational changes in  $\alpha$ COPI-WD40 caused by  
650 Arg<sup>57</sup>→Ala mutation. The mutant and wild type  $\alpha$ COPI-WD40 structures are shown in pink and

651 yellow as the primary colors, respectively. The Arg<sup>57</sup>→Ala mutation generates a cavity in αCOPI-  
652 WD40. The nearby Tyr<sup>97</sup> residue side chain rotates into this cavity. This is accompanied by the  
653 outward rotation of the Asp<sup>73</sup> side chain, which is bonded to Arg<sup>57</sup> in the wild type structure. **(c)**  
654 An analysis of differences in main chain conformation between the wild type and mutant αCOPI-  
655 WD40 crystal structures. The difference in Ramachandran angles was calculated for each  
656 residue, ( $\delta = \sqrt{(\psi_{WT} - \psi_m)^2 + (\phi_{WT} - \phi_m)^2}$ ), where ( $\psi_{WT}$ ,  $\phi_{WT}$ ) and ( $\psi_m$ ,  $\phi_m$ ) are Ramachandran angles for  
657 wild type and each mutant crystal structure. This analysis shows larger conformational changes  
658 in the Arg<sup>57</sup>→Ala mutant (blue) than in Tyr<sup>139</sup>→Ala mutant (orange). The top six peaks are  
659 highlighted. Peak 1 corresponds to a main chain rearrangement coincident with an outward  
660 movement of Asp<sup>73</sup> as shown in panel **(d)**. C $\alpha$  atoms are shown as spheres in panel **(d)**. Upto  
661 1.2Å and 0.8Å shifts in the C $\alpha$  atoms are observed for Gly<sup>72</sup> and Lys<sup>76</sup> respectively, between the  
662 wild type and mutant structures. The intervening residues demonstrate substantial conformational  
663 rearrangement of the main chain. **(e)** In contrast, the αCOPI-WD40 Tyr<sup>139</sup>→Ala mutant structure  
664 (primary color cyan) shows limited changes from the wild type structure (primary color yellow).

665  
666 **Acknowledgements:** We thank Prof. David Owen (University of Cambridge, Cambridge,  
667 England) for critical comments, Dr. Jonathan Goldberg (Memorial Sloan Kettering Cancer Center,  
668 New York City, USA), Dr. Elena Goldberg (Memorial Sloan Kettering Cancer Center, New York  
669 City, USA), and Dr. Lauren Jackson (Vanderbilt University, Nashville USA) for advice on protein  
670 purification, Dr. Travis Gallagher (National Institute of Standards and Technology, Rockville USA)  
671 for advice on crystallographic data collection, Dr. Andrey Galkin (University of Maryland Baltimore  
672 USA) for advice on BLI assays, and Dr. Jean Jakoncic (NSLSII beamline 17-ID-1 AMX), Dr.  
673 Stephan Corcoran (APS beamline 23-ID-D), and Dr. Darren Sherrell (APS beamline 19-ID) for  
674 advice during crystallographic data collection and processing, and Ms. Corrinne Wilson for  
675 assistance in manuscript preparation. SSH acknowledges support from the University of Maryland  
676 School of Medicine, University of Maryland MPower, and MPower COVID-19 Response Fund  
677 Award. This article was supported by funds through the Maryland Department of Health's  
678 Cigarette Restitution Fund Program, University of Maryland Marlene and Stewart Greenebaum  
679 Comprehensive Cancer Center (National Cancer Institute - Cancer Center Support Grant (CCSG)  
680 - P30CA134274), The Holden Comprehensive Cancer Center at The University of Iowa and its  
681 National Cancer Institute Award P30CA086862. This research used resources of the Advanced  
682 Photon Source, a U.S. Department of Energy (DOE) Office of Science User Facility, operated for  
683 the DOE Office of Science by Argonne National Laboratory under Contract No. DE-AC02-  
684 06CH11357. GM/CA@APS has been funded by the National Cancer Institute (ACB-12002) and

685 the National Institute of General Medical Sciences (AGM-12006, P30GM138396). Access to  
686 Sector 84 laboratories at the Advanced Protein Characterization Facility (APCF) was possible  
687 through funding provided by NIH grant GM115586 and DOE contract DE-AC02-06CH11357. This  
688 research used resources AMX of the National Synchrotron Light Source II, a U.S. DOE Office of  
689 Science User Facility operated for the DOE Office of Science by Brookhaven National Laboratory  
690 under contract no. DE-SC0012704.

691

692 **Author contributions:**

693 DD: Data acquisition, analysis, interpretation, and manuscript preparation.

694 SS: Data acquisition, analysis, interpretation, and manuscript preparation.

695 SK: Data acquisition, analysis, and interpretation.

696 MM: Data acquisition.

697 NJS: Data acquisition, analysis, interpretation, and manuscript preparation.

698 LG: Data acquisition, analysis, interpretation, and manuscript preparation.

699 BGP: Data acquisition, analysis, interpretation, and manuscript preparation.

700 SSH: Conception, data acquisition, analysis, interpretation, and manuscript preparation.

701

702 **Competing interests:** The authors declare no competing interests.

703

704 **Data availability:** Coordinates for the crystal structures have been deposited in the Protein Data  
705 Bank with IDs: 7S22 (wild type), 7S16 (Arg<sup>57</sup>→Ala), and 7S23 (Tyr<sup>139</sup>→Ala). The plasmids for  
706 αCOPI-WD40, αCOPI-WD40 mutants (Arg<sup>57</sup>→Ala and Tyr<sup>139</sup>→Ala), and GST-β'COPI-WD40  
707 expression will be deposited in [www.addgene.com](http://www.addgene.com).

708 **References:**

- 709 Afonine, P.V., Grosse-Kunstleve, R.W., Echols, N., Headd, J.J., Moriarty, N.W., Mustyakimov, M.,  
710 Terwilliger, T.C., Urzhumtsev, A., Zwart, P.H., and Adams, P.D. (2012). Towards automated  
711 crystallographic structure refinement with phenix.refine. *Acta Crystallogr D Biol Crystallogr* **68**,  
712 352-367.
- 713 Ahmed, A.E. (2017). The predictors of 3- and 30-day mortality in 660 MERS-CoV patients. *BMC*  
714 *Infect Dis* **17**, 615.
- 715 Beniac, D.R., Andonov, A., Grudski, E., and Booth, T.F. (2006). Architecture of the SARS  
716 coronavirus prefusion spike. *Nat Struct Mol Biol* **13**, 751-752.
- 717 Bolles, M., Donaldson, E., and Baric, R. (2011). SARS-CoV and emergent coronaviruses: viral  
718 determinants of interspecies transmission. *Curr Opin Virol* **1**, 624-634.
- 719 Cattin-Ortolá, J., Welch, L., Maslen, S.L., Skehel, J.M., Papa, G., James, L.C., and Munro, S.  
720 (2021). Sequences in the cytoplasmic tail of SARS-CoV-2 Spike facilitate expression at the cell  
721 surface and syncytia formation. *bioRxiv*, 2020.2010.2012.335562.
- 722 Conway, P., Tyka, M.D., DiMaio, F., Konerding, D.E., and Baker, D. (2014). Relaxation of  
723 backbone bond geometry improves protein energy landscape modeling. *Protein Sci* **23**, 47-55.
- 724 Cosson, P., and Letourneur, F. (1994). Coatmer interaction with di-lysine endoplasmic reticulum  
725 retention motifs. *Science* **263**, 1629-1631.
- 726 Dodonova, S.O., Diestelkoetter-Bachert, P., von Appen, A., Hagen, W.J., Beck, R., Beck, M.,  
727 Wieland, F., and Briggs, J.A. (2015). VESICULAR TRANSPORT. A structure of the COPI coat  
728 and the role of coat proteins in membrane vesicle assembly. *Science* **349**, 195-198.
- 729 Duden, R., Griffiths, G., Frank, R., Argos, P., and Kreis, T.E. (1991). Beta-COP, a 110 kd protein  
730 associated with non-clathrin-coated vesicles and the Golgi complex, shows homology to beta-  
731 adaptin. *Cell* **64**, 649-665.
- 732 Emsley, P., and Cowtan, K. (2004). Coot: Model-building tools for molecular graphics. *Acta*  
733 *Crystallogr D Biol Crystallogr* **60**, 2126-2132.
- 734 Eugster, A., Frigerio, G., Dale, M., and Duden, R. (2004). The alpha- and beta'-COP WD40  
735 domains mediate cargo-selective interactions with distinct di-lysine motifs. *Mol Biol Cell* **15**, 1011-  
736 1023.
- 737 Evans, P.R., and Murshudov, G.N. (2013). How good are my data and what is the resolution?  
738 *Acta Crystallogr D Biol Crystallogr* **69**, 1204-1214.
- 739 Fiedler, K., Veit, M., Stamnes, M.A., and Rothman, J.E. (1996). Bimodal interaction of coatmer  
740 with the p24 family of putative cargo receptors. *Science* **273**, 1396-1399.
- 741 Gaynor, E.C., te Heesen, S., Graham, T.R., Aebi, M., and Emr, S.D. (1994). Signal-mediated  
742 retrieval of a membrane protein from the Golgi to the ER in yeast. *J Cell Biol* **127**, 653-665.
- 743 Ge, X.Y., Li, J.L., Yang, X.L., Chmura, A.A., Zhu, G., Epstein, J.H., Mazet, J.K., Hu, B., Zhang,  
744 W., Peng, C., *et al.* (2013). Isolation and characterization of a bat SARS-like coronavirus that uses  
745 the ACE2 receptor. *Nature* **503**, 535-538.
- 746 Gottlieb, R.A., Nordberg, J., Skowronski, E., and Babior, B.M. (1996). Apoptosis induced in Jurkat  
747 cells by several agents is preceded by intracellular acidification. *Proc Natl Acad Sci U S A* **93**,  
748 654-658.
- 749 Guan, Y., Zheng, B.J., He, Y.Q., Liu, X.L., Zhuang, Z.X., Cheung, C.L., Luo, S.W., Li, P.H., Zhang,  
750 L.J., Guan, Y.J., *et al.* (2003). Isolation and characterization of viruses related to the SARS  
751 coronavirus from animals in southern China. *Science* **302**, 276-278.
- 752 Han, H.J., Yu, H., and Yu, X.J. (2016). Evidence for zoonotic origins of Middle East respiratory  
753 syndrome coronavirus. *J Gen Virol* **97**, 274-280.
- 754 Hara-Kuge, S., Kuge, O., Orci, L., Amherdt, M., Ravazzola, M., Wieland, F.T., and Rothman, J.E.  
755 (1994). En bloc incorporation of coatmer subunits during the assembly of COP-coated vesicles.  
756 *J Cell Biol* **124**, 883-892.

757 Harrison-Lavoie, K.J., Lewis, V.A., Hynes, G.M., Collison, K.S., Nutland, E., and Willison, K.R.  
758 (1993). A 102 kDa subunit of a Golgi-associated particle has homology to beta subunits of trimeric  
759 G proteins. *EMBO J* 12, 2847-2853.

760 Jackson, L.P., Lewis, M., Kent, H.M., Edeling, M.A., Evans, P.R., Duden, R., and Owen, D.J.  
761 (2012). Molecular basis for recognition of dilysine trafficking motifs by COPI. *Dev Cell* 23, 1255-  
762 1262.

763 Jackson, M.R., Nilsson, T., and Peterson, P.A. (1993). Retrieval of transmembrane proteins to  
764 the endoplasmic reticulum. *J Cell Biol* 121, 317-333.

765 Jennings, B.C., Kornfeld, S., and Doray, B. (2021). A weak COPI binding motif in the cytoplasmic  
766 tail of SARS-CoV-2 spike glycoprotein is necessary for its cleavage, glycosylation, and  
767 localization. *FEBS Lett* 595, 1758-1767.

768 Kabsch, W. (2010). Xds. *Acta Crystallogr D Biol Crystallogr* 66, 125-132.

769 Klumperman, J., Locker, J.K., Meijer, A., Horzinek, M.C., Geuze, H.J., and Rottier, P.J. (1994).  
770 Coronavirus M proteins accumulate in the Golgi complex beyond the site of virion budding. *J Virol*  
771 68, 6523-6534.

772 Kortemme, T., and Baker, D. (2002). A simple physical model for binding energy hot spots in  
773 protein-protein complexes. *Proc Natl Acad Sci U S A* 99, 14116-14121.

774 Latinne, A., Hu, B., Olival, K.J., Zhu, G., Zhang, L., Li, H., Chmura, A.A., Field, H.E., Zambrana-  
775 Torrelío, C., Epstein, J.H., *et al.* (2020). Origin and cross-species transmission of bat  
776 coronaviruses in China. *Nat Commun* 11, 4235.

777 Lau, S.K., Woo, P.C., Li, K.S., Huang, Y., Tsoi, H.W., Wong, B.H., Wong, S.S., Leung, S.Y., Chan,  
778 K.H., and Yuen, K.Y. (2005). Severe acute respiratory syndrome coronavirus-like virus in Chinese  
779 horseshoe bats. *Proc Natl Acad Sci U S A* 102, 14040-14045.

780 Letourneur, F., Gaynor, E.C., Hennecke, S., Demolliere, C., Duden, R., Emr, S.D., Riezman, H.,  
781 and Cosson, P. (1994). Coatamer is essential for retrieval of dilysine-tagged proteins to the  
782 endoplasmic reticulum. *Cell* 79, 1199-1207.

783 Li, S., Zhang, Y., Guan, Z., Li, H., Ye, M., Chen, X., Shen, J., Zhou, Y., Shi, Z.L., Zhou, P., *et al.*  
784 (2020a). SARS-CoV-2 triggers inflammatory responses and cell death through caspase-8  
785 activation. *Signal Transduct Target Ther* 5, 235.

786 Li, W., Shi, Z., Yu, M., Ren, W., Smith, C., Epstein, J.H., Wang, H., Crameri, G., Hu, Z., Zhang,  
787 H., *et al.* (2005). Bats are natural reservoirs of SARS-like coronaviruses. *Science* 310, 676-679.

788 Li, Z., Liu, G., Wang, L., Liang, Y., Zhou, Q., Wu, F., Yao, J., and Chen, B. (2020b). From the  
789 insight of glucose metabolism disorder: Oxygen therapy and blood glucose monitoring are crucial  
790 for quarantined COVID-19 patients. *Ecotoxicol Environ Saf* 197, 110614.

791 Lontok, E., Corse, E., and Machamer, C.E. (2004). Intracellular targeting signals contribute to  
792 localization of coronavirus spike proteins near the virus assembly site. *J Virol* 78, 5913-5922.

793 Ma, W., and Goldberg, J. (2013). Rules for the recognition of dilysine retrieval motifs by coatamer.  
794 *EMBO J* 32, 926-937.

795 Malhotra, V., Serafini, T., Orci, L., Shepherd, J.C., and Rothman, J.E. (1989). Purification of a  
796 novel class of coated vesicles mediating biosynthetic protein transport through the Golgi stack.  
797 *Cell* 58, 329-336.

798 McBride, C.E., Li, J., and Machamer, C.E. (2007). The cytoplasmic tail of the severe acute  
799 respiratory syndrome coronavirus spike protein contains a novel endoplasmic reticulum retrieval  
800 signal that binds COPI and promotes interaction with membrane protein. *J Virol* 81, 2418-2428.

801 McCoy, A.J., Grosse-Kunstleve, R.W., Adams, P.D., Winn, M.D., Storoni, L.C., and Read, R.J.  
802 (2007). Phaser crystallographic software. *J Appl Crystallogr* 40, 658-674.

803 Minor, W., Cymborowski, M., Otwinowski, Z., and Chruszcz, M. (2006). HKL-3000: the integration  
804 of data reduction and structure solution--from diffraction images to an initial model in minutes.  
805 *Acta Crystallogr D Biol Crystallogr* 62, 859-866.

806 Morin, A., Eisenbraun, B., Key, J., Sanschagrin, P.C., Timony, M.A., Ottaviano, M., and Sliz, P.  
807 (2013). Collaboration gets the most out of software. *Elife* 2, e01456.

808 Pierce, B.G., Hellman, L.M., Hossain, M., Singh, N.K., Vander Kooi, C.W., Weng, Z., and Baker,  
809 B.M. (2014). Computational design of the affinity and specificity of a therapeutic T cell receptor.  
810 PLoS Comput Biol 10, e1003478.  
811 Polack, F.P., Thomas, S.J., Kitchin, N., Absalon, J., Gurtman, A., Lockhart, S., Perez, J.L., Perez  
812 Marc, G., Moreira, E.D., Zerbini, C., *et al.* (2020). Safety and Efficacy of the BNT162b2 mRNA  
813 Covid-19 Vaccine. N Engl J Med 383, 2603-2615.  
814 Raj, V.S., Farag, E.A., Reusken, C.B., Lamers, M.M., Pas, S.D., Voermans, J., Smits, S.L.,  
815 Osterhaus, A.D., Al-Mawlawi, N., Al-Romaihi, H.E., *et al.* (2014). Isolation of MERS coronavirus  
816 from a dromedary camel, Qatar, 2014. Emerg Infect Dis 20, 1339-1342.  
817 Roess, A., Carruth, L., Lahm, S., and Salman, M. (2016). Camels, MERS-CoV, and other  
818 emerging infections in east Africa. Lancet Infect Dis 16, 14-15.  
819 Rossmann, M.G., and Blow, D.M. (1962). The detection of sub-units within the crystallographic  
820 asymmetric unit. Acta Crystallographica 15, 24-31.  
821 Schroder-Kohne, S., Letourneur, F., and Riezman, H. (1998). Alpha-COP can discriminate  
822 between distinct, functional di-lysine signals in vitro and regulates access into retrograde  
823 transport. J Cell Sci 111 ( Pt 23), 3459-3470.  
824 Serafini, T., Stenbeck, G., Brecht, A., Lottspeich, F., Orci, L., Rothman, J.E., and Wieland, F.T.  
825 (1991). A coat subunit of Golgi-derived non-clathrin-coated vesicles with homology to the clathrin-  
826 coated vesicle coat protein beta-adaptin. Nature 349, 215-220.  
827 Song, H.C., Seo, M.Y., Stadler, K., Yoo, B.J., Choo, Q.L., Coates, S.R., Uematsu, Y., Harada, T.,  
828 Greer, C.E., Polo, J.M., *et al.* (2004). Synthesis and characterization of a native, oligomeric form  
829 of recombinant severe acute respiratory syndrome coronavirus spike glycoprotein. J Virol 78,  
830 10328-10335.  
831 Stadler, K., Masignani, V., Eickmann, M., Becker, S., Abrignani, S., Klenk, H.D., and Rappuoli, R.  
832 (2003). SARS--beginning to understand a new virus. Nat Rev Microbiol 1, 209-218.  
833 Stenbeck, G., Harter, C., Brecht, A., Herrmann, D., Lottspeich, F., Orci, L., and Wieland, F.T.  
834 (1993). beta'-COP, a novel subunit of coatomer. EMBO J 12, 2841-2845.  
835 Tang, X.C., Zhang, J.X., Zhang, S.Y., Wang, P., Fan, X.H., Li, L.F., Li, G., Dong, B.Q., Liu, W.,  
836 Cheung, C.L., *et al.* (2006). Prevalence and genetic diversity of coronaviruses in bats from China.  
837 J Virol 80, 7481-7490.  
838 Thul, P.J., Akesson, L., Wiking, M., Mahdessian, D., Geladaki, A., Ait Blal, H., Alm, T., Asplund,  
839 A., Bjork, L., Breckels, L.M., *et al.* (2017). A subcellular map of the human proteome. Science  
840 356.  
841 Townsley, F.M., and Pelham, H.R. (1994). The KKXX signal mediates retrieval of membrane  
842 proteins from the Golgi to the ER in yeast. Eur J Cell Biol 64, 211-216.  
843 USFDA (2020). U.S. Food and Drug Administration. Moderna COVID-19 vaccine [FDA briefing  
844 document]. Silver Spring, MD: U.S. Food and Drug Administration, Vaccines and Related  
845 Biological Products Advisory Committee; 2020.  
846 Vece, T.J., Watkin, L.B., Nicholas, S., Canter, D., Braun, M.C., Guillerman, R.P., Eldin, K.W.,  
847 Bertolet, G., McKinley, S., de Guzman, M., *et al.* (2016). Copa Syndrome: a Novel Autosomal  
848 Dominant Immune Dysregulatory Disease. J Clin Immunol 36, 377-387.  
849 Waters, M.G., Serafini, T., and Rothman, J.E. (1991). 'Coatomer': a cytosolic protein complex  
850 containing subunits of non-clathrin-coated Golgi transport vesicles. Nature 349, 248-251.  
851 Watkin, L.B., Jessen, B., Wiszniewski, W., Vece, T.J., Jan, M., Sha, Y., Thamsen, M., Santos-  
852 Cortez, R.L., Lee, K., Gambin, T., *et al.* (2015). COPA mutations impair ER-Golgi transport and  
853 cause hereditary autoimmune-mediated lung disease and arthritis. Nat Genet 47, 654-660.  
854 Webb, B., and Sali, A. (2014). Protein structure modeling with MODELLER. Methods Mol Biol  
855 1137, 1-15.  
856 Williams, C.J., Headd, J.J., Moriarty, N.W., Prisant, M.G., Videau, L.L., Deis, L.N., Verma, V.,  
857 Keedy, D.A., Hintze, B.J., Chen, V.B., *et al.* (2018). MolProbity: More and better reference data  
858 for improved all-atom structure validation. Protein Sci 27, 293-315.

859 Xiao, K., Zhai, J., Feng, Y., Zhou, N., Zhang, X., Zou, J.J., Li, N., Guo, Y., Li, X., Shen, X., *et al.*  
860 (2020). Isolation of SARS-CoV-2-related coronavirus from Malayan pangolins. *Nature* 583, 286-  
861 289.

862 Yan, H., Xiao, G., Zhang, J., Hu, Y., Yuan, F., Cole, D.K., Zheng, C., and Gao, G.F. (2004). SARS  
863 coronavirus induces apoptosis in Vero E6 cells. *J Med Virol* 73, 323-331.

864 Zaki, A.M., van Boheemen, S., Bestebroer, T.M., Osterhaus, A.D., and Fouchier, R.A. (2012).  
865 Isolation of a novel coronavirus from a man with pneumonia in Saudi Arabia. *N Engl J Med* 367,  
866 1814-1820.

867 Zhang, T., Wu, Q., and Zhang, Z. (2020). Probable Pangolin Origin of SARS-CoV-2 Associated  
868 with the COVID-19 Outbreak. *Curr Biol* 30, 1346-1351 e1342.

869



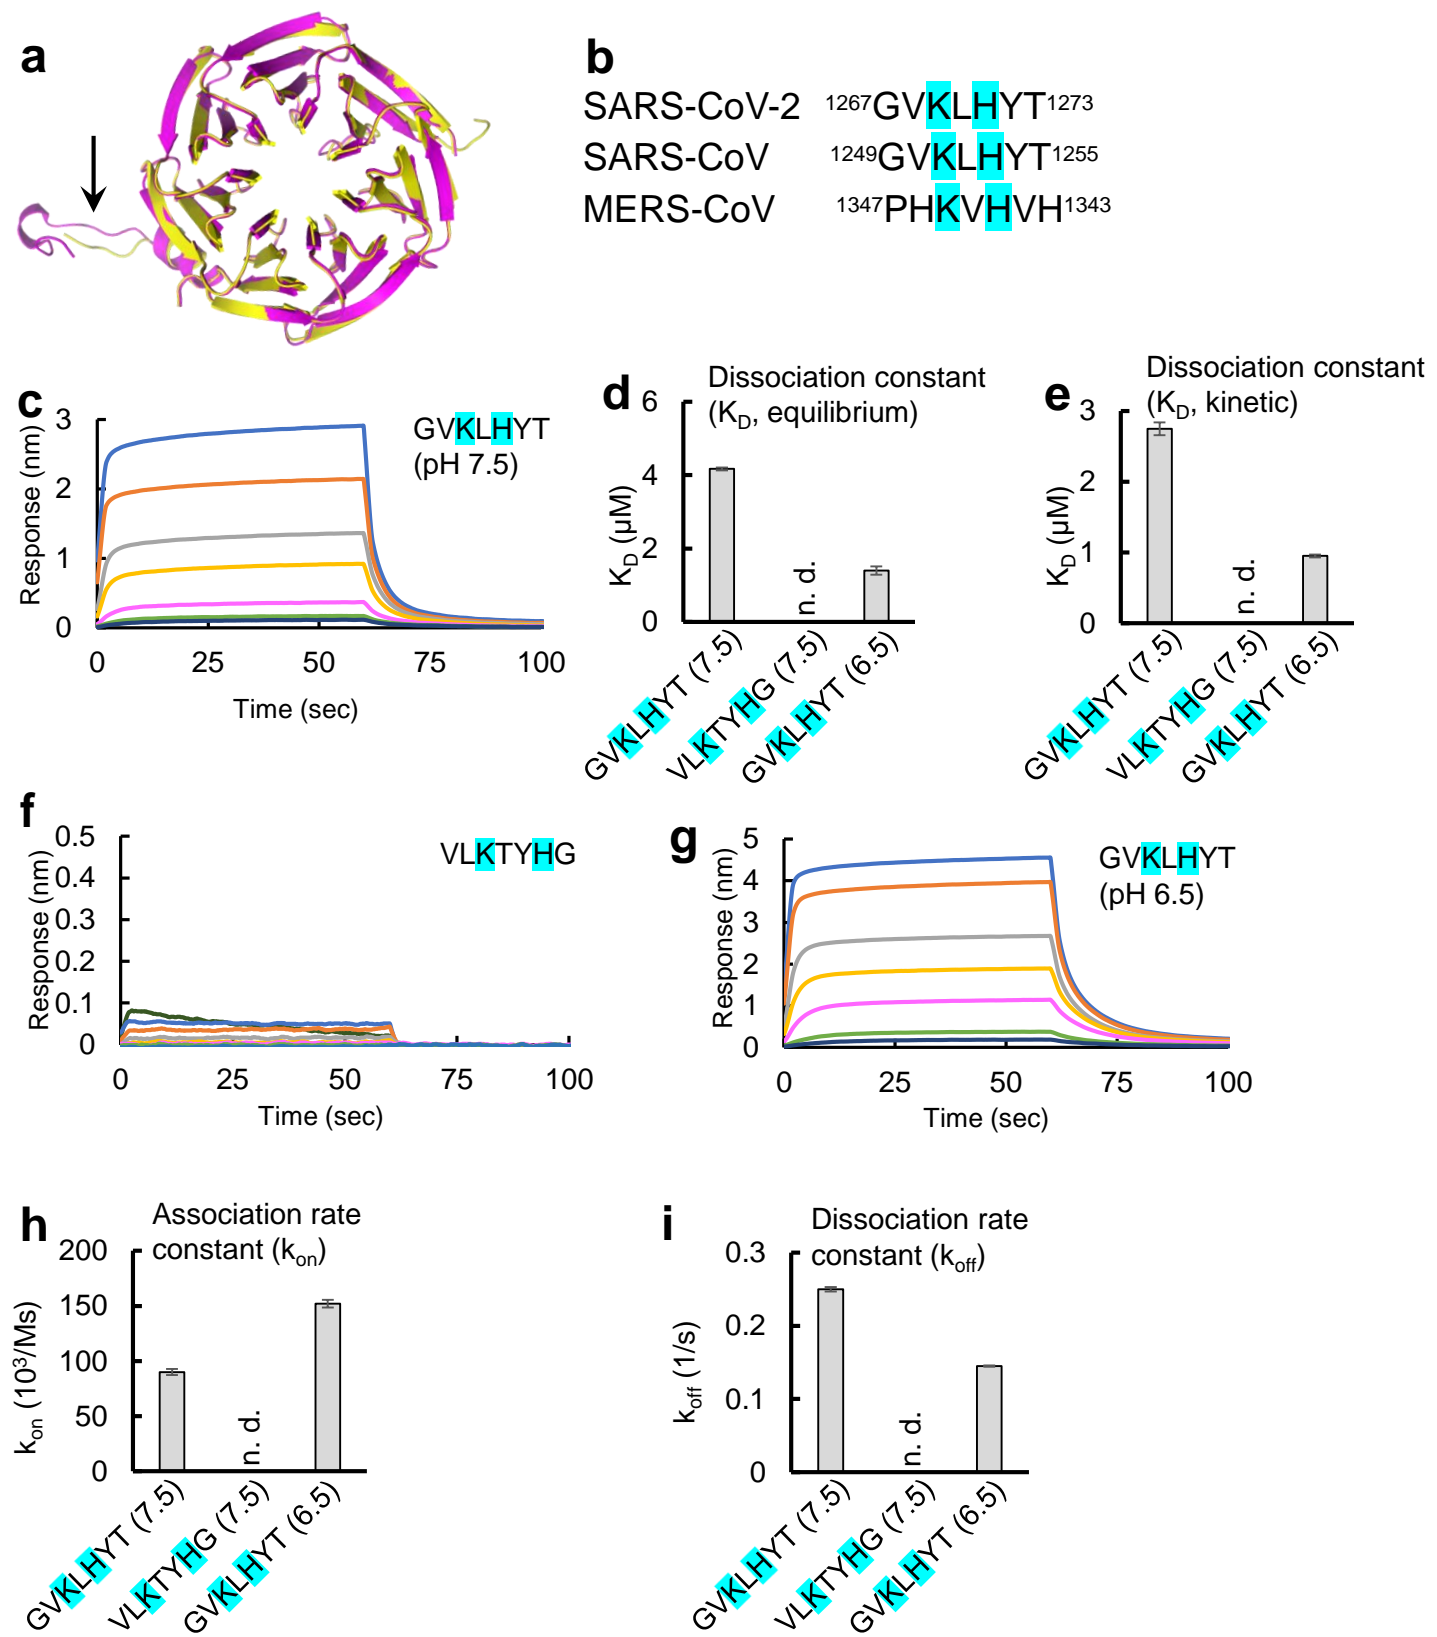

**Fig 1**

— 8 $\mu\text{M}$  — 5 $\mu\text{M}$  — 2 $\mu\text{M}$  — 1 $\mu\text{M}$  — 0.3 $\mu\text{M}$  — 0.1 $\mu\text{M}$  — 0.05 $\mu\text{M}$

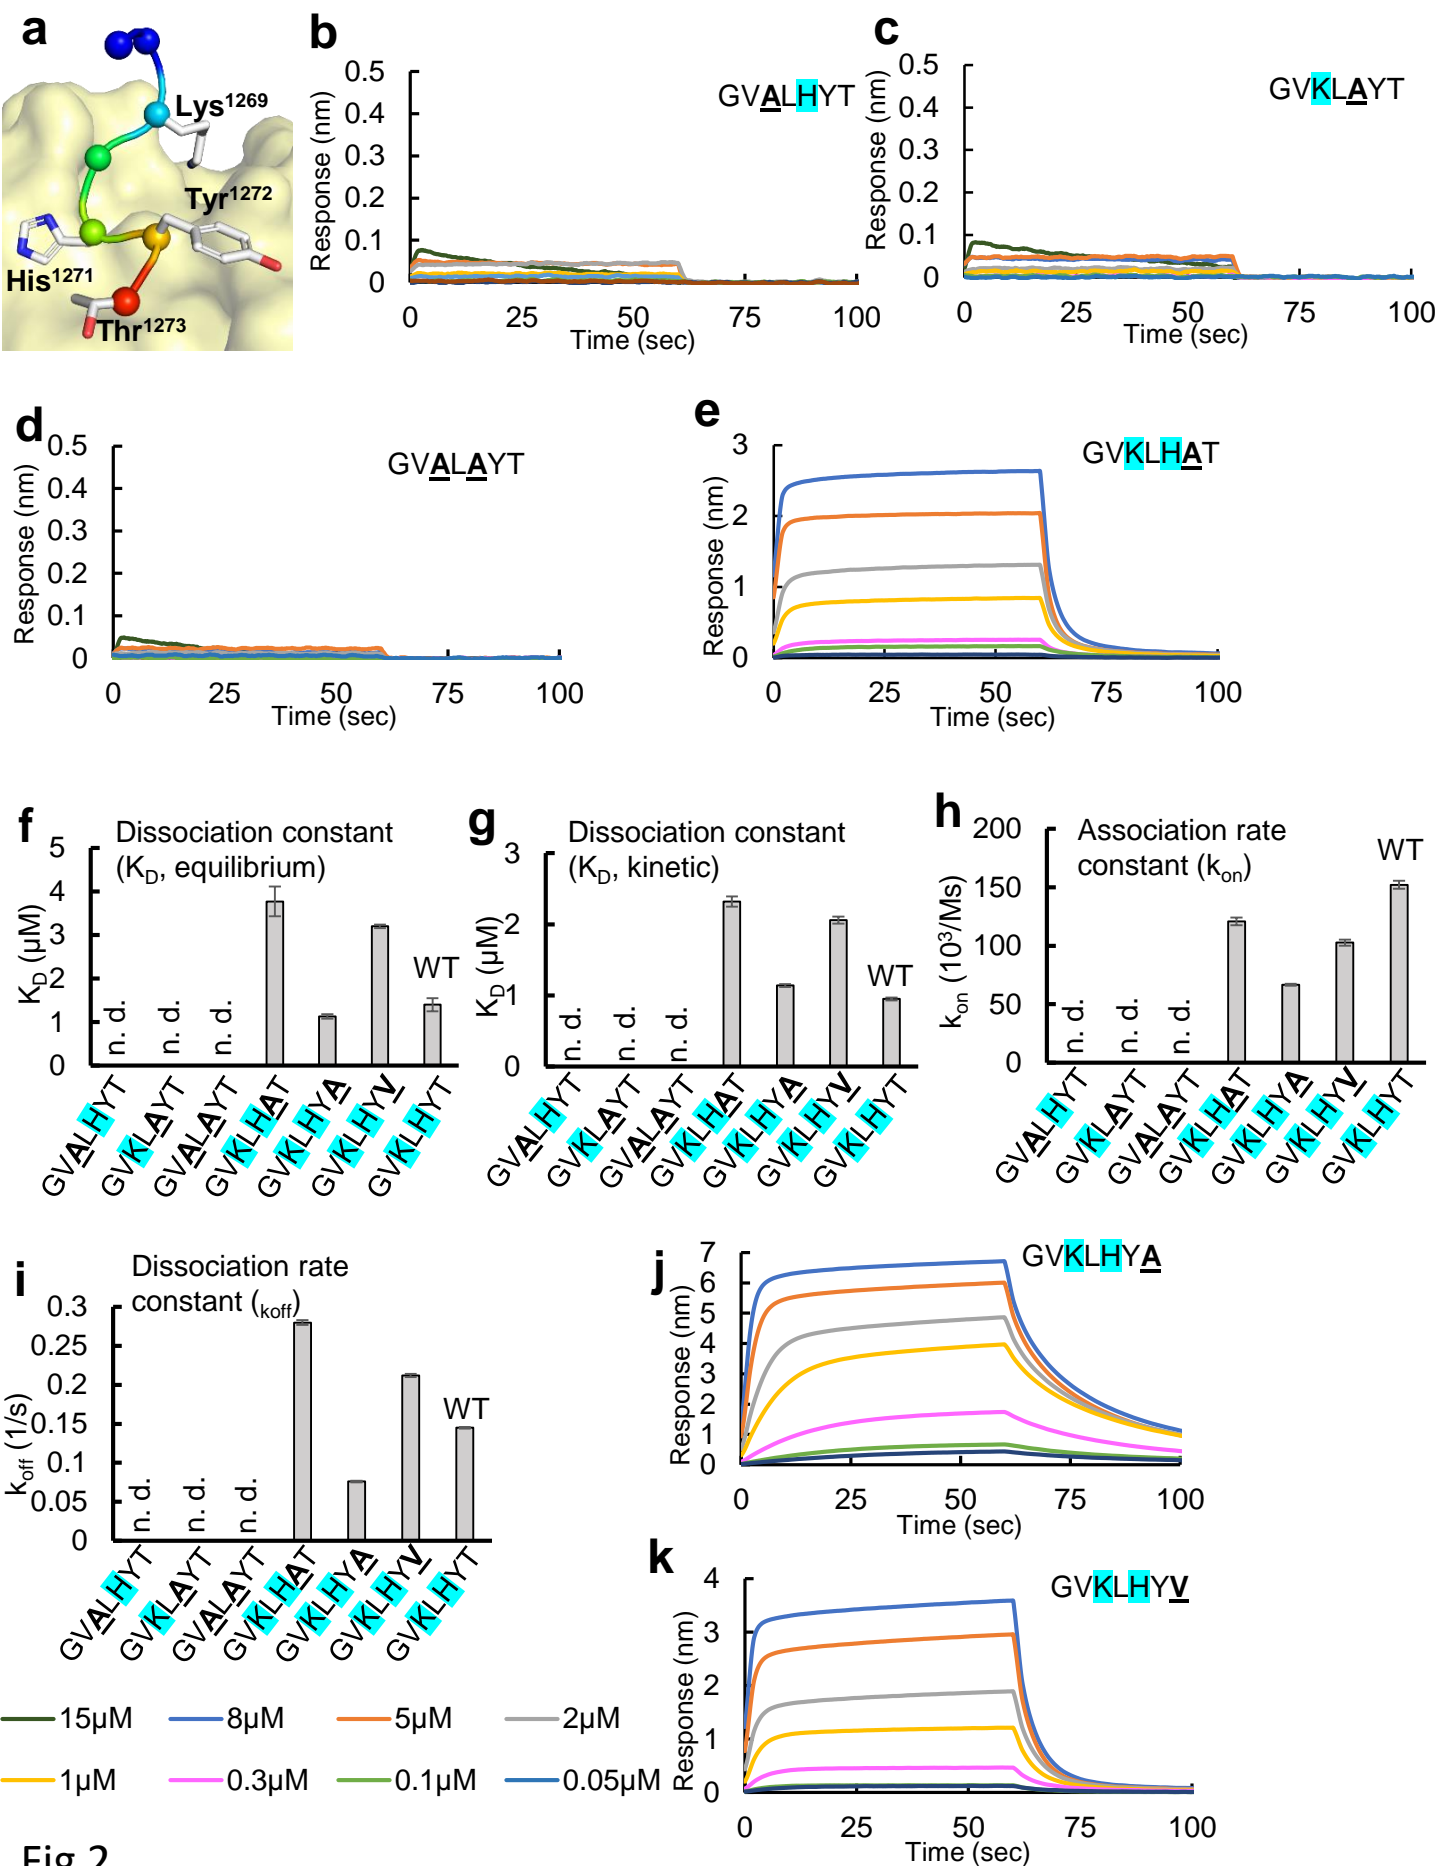

Fig 2

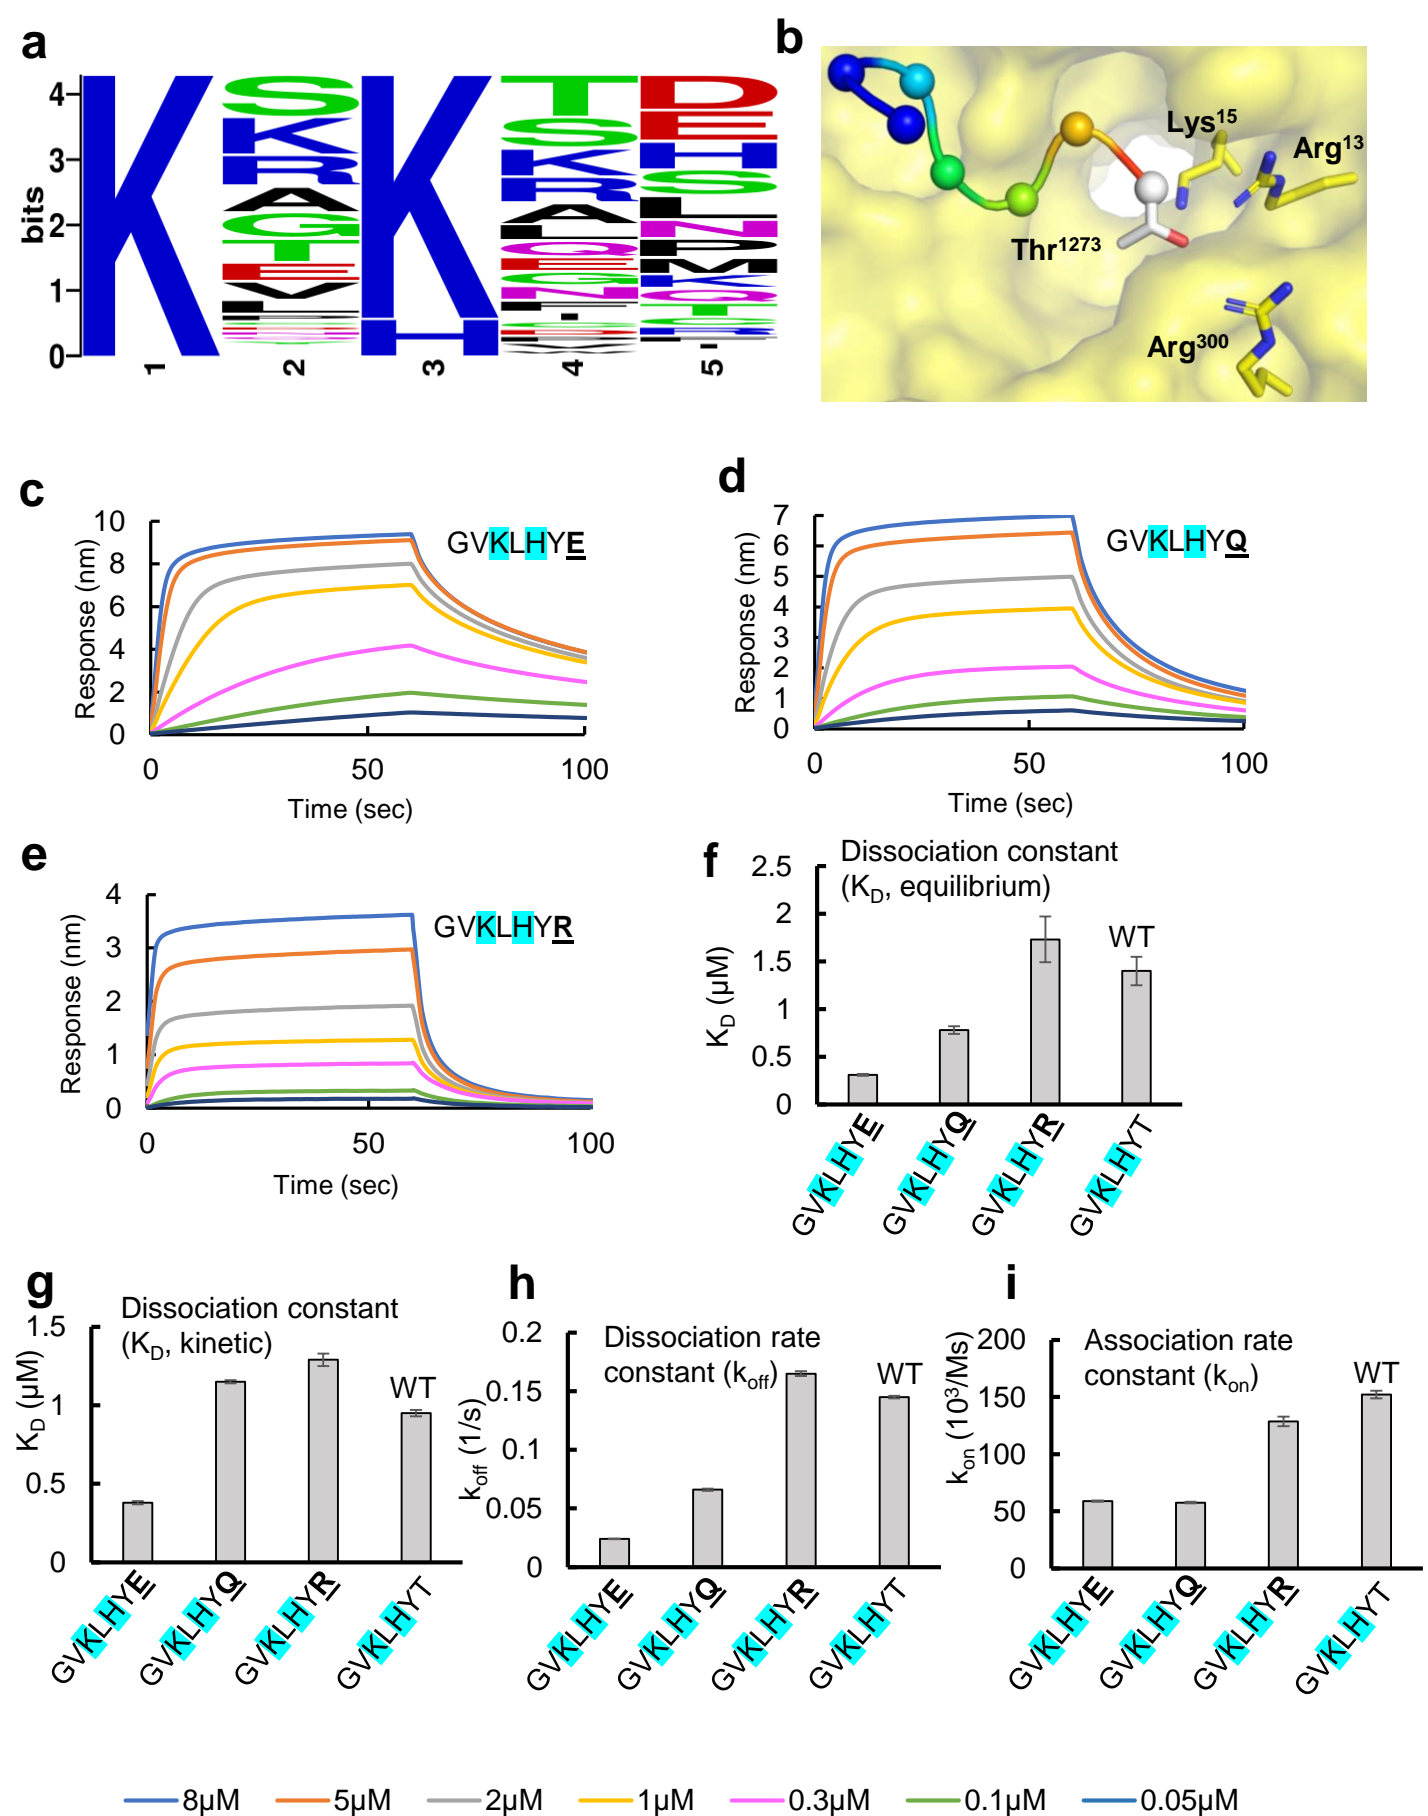

Fig 3

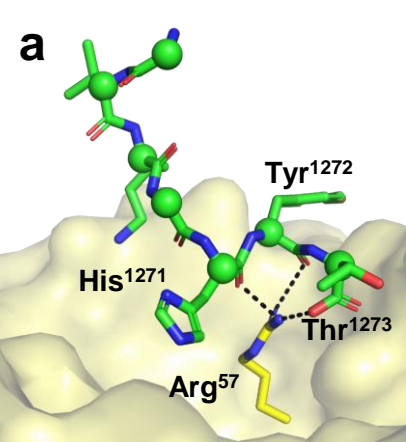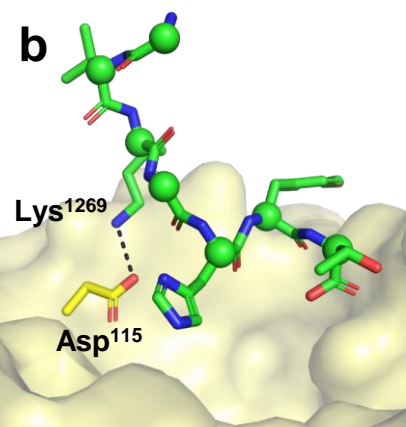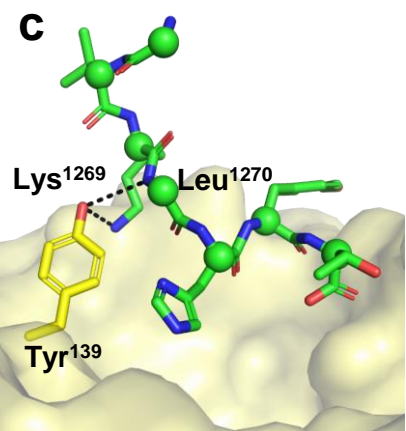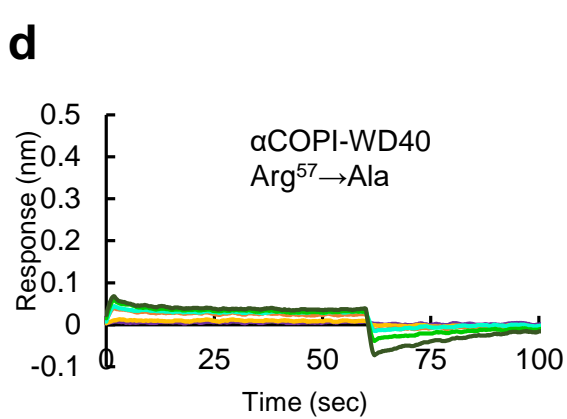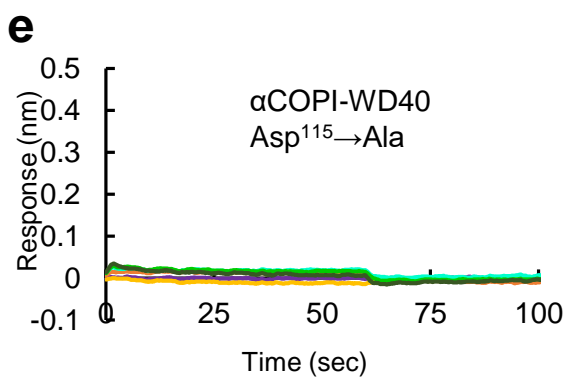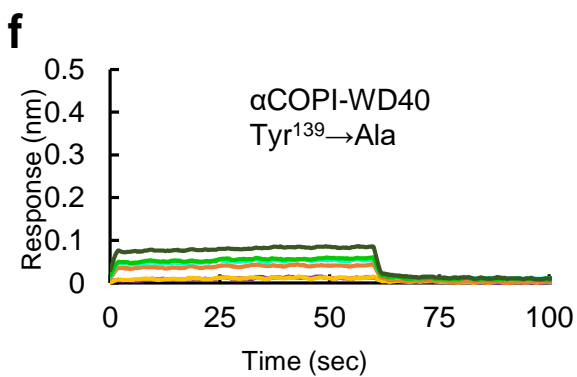

— 0.5 $\mu$ M — 1 $\mu$ M — 5 $\mu$ M — 7.5 $\mu$ M — 10 $\mu$ M — 15 $\mu$ M

Fig 4

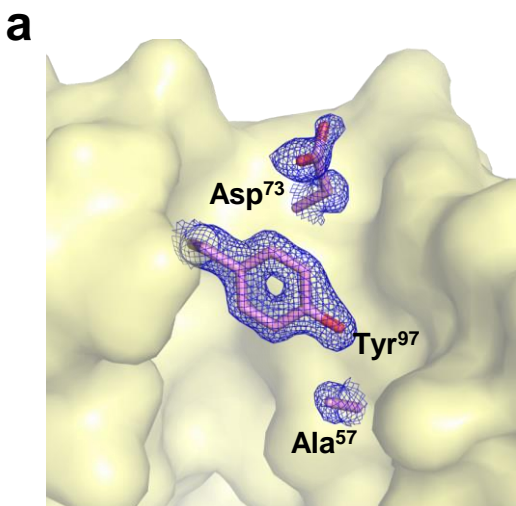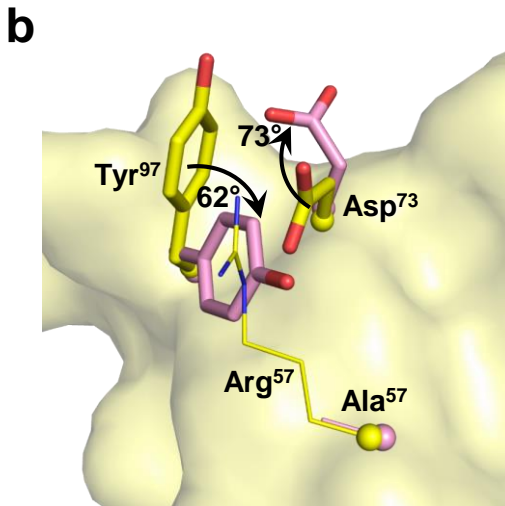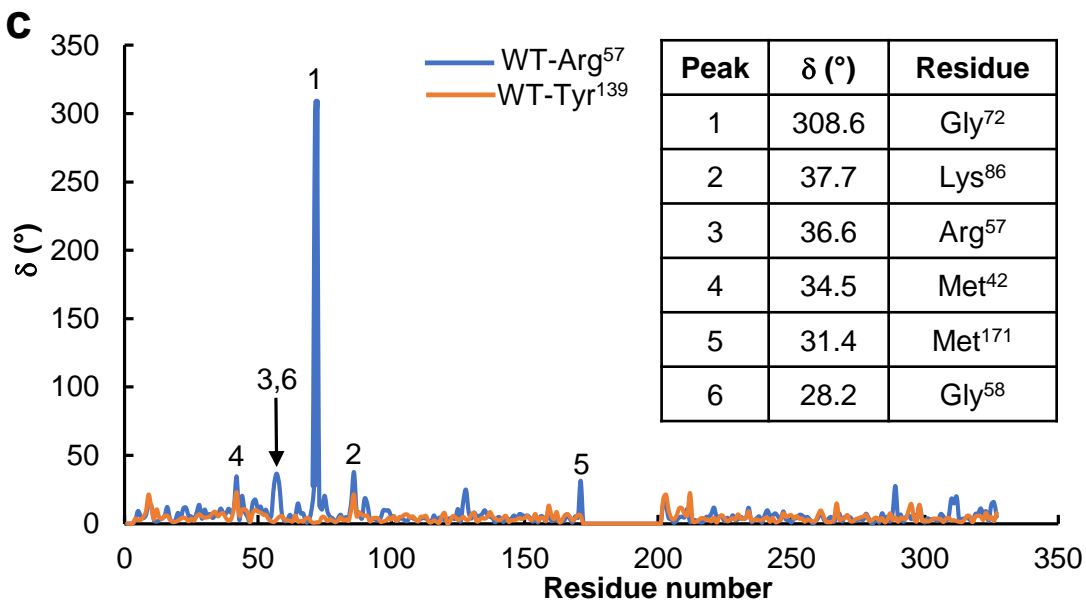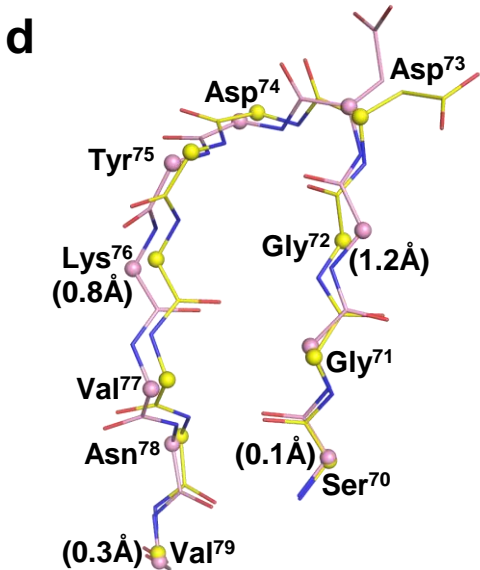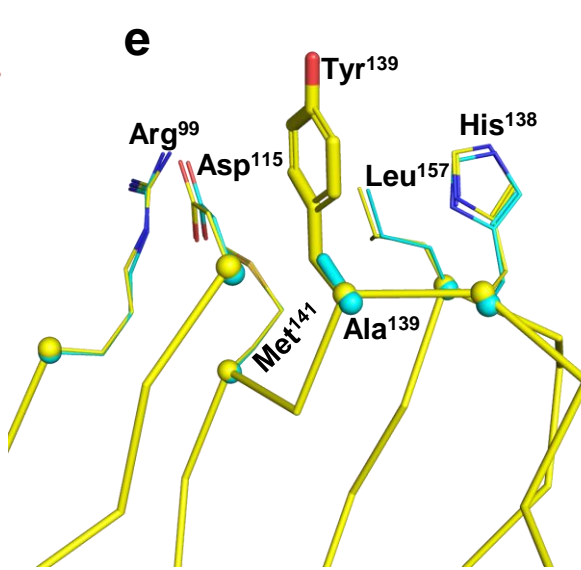

Fig 5
